# Supplementary material
Source: PubMed Central journal article supplement (PMC8803500)
Supplement: nmab095_supplemental_file.pdf [file nmab095_supplemental_file.pdf]

Evaluating concordance of bodies of evidence from randomized controlled trials,  
dietary intake and biomarkers of intake in cohort studies: a meta-epidemiological  
study

Jessica Beyerbach<sup>1</sup>, Julia Stadelmaier<sup>1</sup>, Georg Hoffmann<sup>2</sup>, Sara Balduzzi<sup>3</sup>, Nils Bröckelmann<sup>1</sup>, Lukas Schwingshackl<sup>1</sup>

<sup>1</sup>Institute for Evidence in Medicine, Medical Center - University of Freiburg, Faculty of Medicine, University of Freiburg, Freiburg, Germany.

<sup>2</sup>Department of Nutritional Sciences, University of Vienna, Vienna, Austria.

<sup>3</sup>Institute of Medical Biometry and Statistics, Medical Center - University of Freiburg, Faculty of Medicine, University of Freiburg, Freiburg, Germany.

Corresponding author:

Lukas Schwingshackl, PhD

Breisacher Straße 86, 79110 Freiburg, Germany

M: schwingshackl@ifem.uni-freiburg.de

T: +49 (0)761 203-96867

Supplementary data

Supplemental Appendix 1: Search strategy for systematic reviews of randomized controlled trials in the Cochrane Database of Systematic Reviews

| ID  | Search                                                                                                                                                                                                                                                                                                                                         | Hits       |
|-----|------------------------------------------------------------------------------------------------------------------------------------------------------------------------------------------------------------------------------------------------------------------------------------------------------------------------------------------------|------------|
| #1  | MeSH descriptor: [Diet, Carbohydrate-Restricted] explode all trees                                                                                                                                                                                                                                                                             | 385        |
| #2  | MeSH descriptor: [Healthy Diet] explode all trees                                                                                                                                                                                                                                                                                              | 336        |
| #3  | MeSH descriptor: [Diet, Mediterranean] this term only                                                                                                                                                                                                                                                                                          | 434        |
| #4  | MeSH descriptor: [Dietary Approaches To Stop Hypertension] explode all trees                                                                                                                                                                                                                                                                   | 15         |
| #5  | MeSH descriptor: [Micronutrients] explode all trees                                                                                                                                                                                                                                                                                            | 4,992      |
| #6  | MeSH descriptor: [Dietary Supplements] explode all trees                                                                                                                                                                                                                                                                                       | 11,620     |
| #7  | (mediterranean or dash diet or low-carb* or low-fat* or grain* or vegetable* or fruit* or milk or dairy or meat or processed meat* or fish or eggs or nuts or chocolate or oil*):ti,ab,kw                                                                                                                                                      | 40,401     |
| #8  | (carbohydrate* or fructose or glucose or starch or sucrose or fibre or psyllium or inulin or cellulose or prebiotic* or probiotic* or synbiotic* or n-3 or omega 3 or omega-3 or n3 or n6 or n-6 or omega 6 or omega-6 or unsaturated or monounsaturated or polyunsaturated or EPA or DHA or linoleic acid or protein or amino acid*):ti,ab,kw | 167,040    |
| #9  | (vitamin* or beta-carot* or ascorbic acid or cholecalciferol* or ergocalciferol or thiamine or riboflavin or niacin or pyridoxine or cobalamin or folic acid or magnesium or calcium or selenium or sodium or potassium or iron or zinc or copper or iodine):ti,ab,kw                                                                          | 118,402    |
| #10 | #1 or #2 or #3 or #4 or #5 or #6 or #7 or #8 or #9                                                                                                                                                                                                                                                                                             | 283,530    |
| #11 | (diet* or nutrition or eat* or consum* or intake):ti,ab,kw                                                                                                                                                                                                                                                                                     | 163,651    |
| #12 | #10 and #11                                                                                                                                                                                                                                                                                                                                    | 83,677     |
| #13 | (mortal* or cancer or diabetes or dementia or macular degeneration or body weight or blood pressure or glucose or cholester*):ti,ab,kw                                                                                                                                                                                                         | 448,002    |
| #14 | #12 and #13                                                                                                                                                                                                                                                                                                                                    | 48,529     |
|     |                                                                                                                                                                                                                                                                                                                                                |            |
| #15 | Cochrane Reviews "2010 - 2019"                                                                                                                                                                                                                                                                                                                 | <b>333</b> |

Supplementary data

Supplemental Appendix 2: Search strategy for systematic reviews of cohort studies in Ovid MEDLINE

| ID  | Search                                                                                                                                                                                                                                                                                                                                       | Hits         |
|-----|----------------------------------------------------------------------------------------------------------------------------------------------------------------------------------------------------------------------------------------------------------------------------------------------------------------------------------------------|--------------|
| #1  | (non-randomised or non-randomized or nrs or observational* or cohort or prospective or longitudinal* or follow* or case-cohort or nested case-control or epidemio*).ti,ab,kf.                                                                                                                                                                | 4,466,200    |
| #2  | (meta-analys* or metaanalys* or "systematic review" or systematic-review).ti,ab.                                                                                                                                                                                                                                                             | 238,477      |
| #3  | (Systematic Review or Meta-Analysis).pt.                                                                                                                                                                                                                                                                                                     | 177,170      |
| #4  | #1 and (#2 or #3)                                                                                                                                                                                                                                                                                                                            | 104,427      |
| #5  | Diet, Mediterranean/ or Diet, Carbohydrate-Restricted/ or Healthy Diet/ or Dietary Approch to Stop Hypertension/ or Micronutrients/ or Dietary Supplements/                                                                                                                                                                                  | 65,391       |
| #6  | (mediterranean or dash diet or low-carb* or low-fat* or grain* or vegetable* or fruit* or milk or dairy or meat or processed meat* or fish or eggs or nuts or chocolate or oil*).ti,ab.                                                                                                                                                      | 733,079      |
| #7  | (carbohydrate* or fructose or glucose or starch or sucrose or fibre or psyllium or inulin or cellulose or prebiotic* or probiotic* or synbiotic* or n-3 or omega 3 or omega-3 or n3 or n6 or n-6 or omega 6 or omega-6 or unsaturated or monounsaturated or polyunsaturated or EPA or DHA or linoleic acid or protein or amino acid*).ti,ab. | 3,445,283    |
| #8  | (vitamin* or beta-carot* or ascorbic acid or cholecalciferol* or ergocalciferol or thiamine or riboflavin or niacin or pyridoxine or cobalamin or folic acid or magnesium or calcium or selenium or sodium or potassium or iron or zinc or copper or iodine).ti,ab.                                                                          | 1,391,454    |
| #9  | (diet* or nutrition or eat* or consum* or intake).ti,ab.                                                                                                                                                                                                                                                                                     | 1,173,600    |
| #10 | (#5 or #6 or #7 or #8) and #9                                                                                                                                                                                                                                                                                                                | 502,160      |
| #11 | #4 and #10                                                                                                                                                                                                                                                                                                                                   | 3,809        |
| #12 | limit #11 to yr="2010 - 2019"                                                                                                                                                                                                                                                                                                                | <b>3,118</b> |

Supplementary data

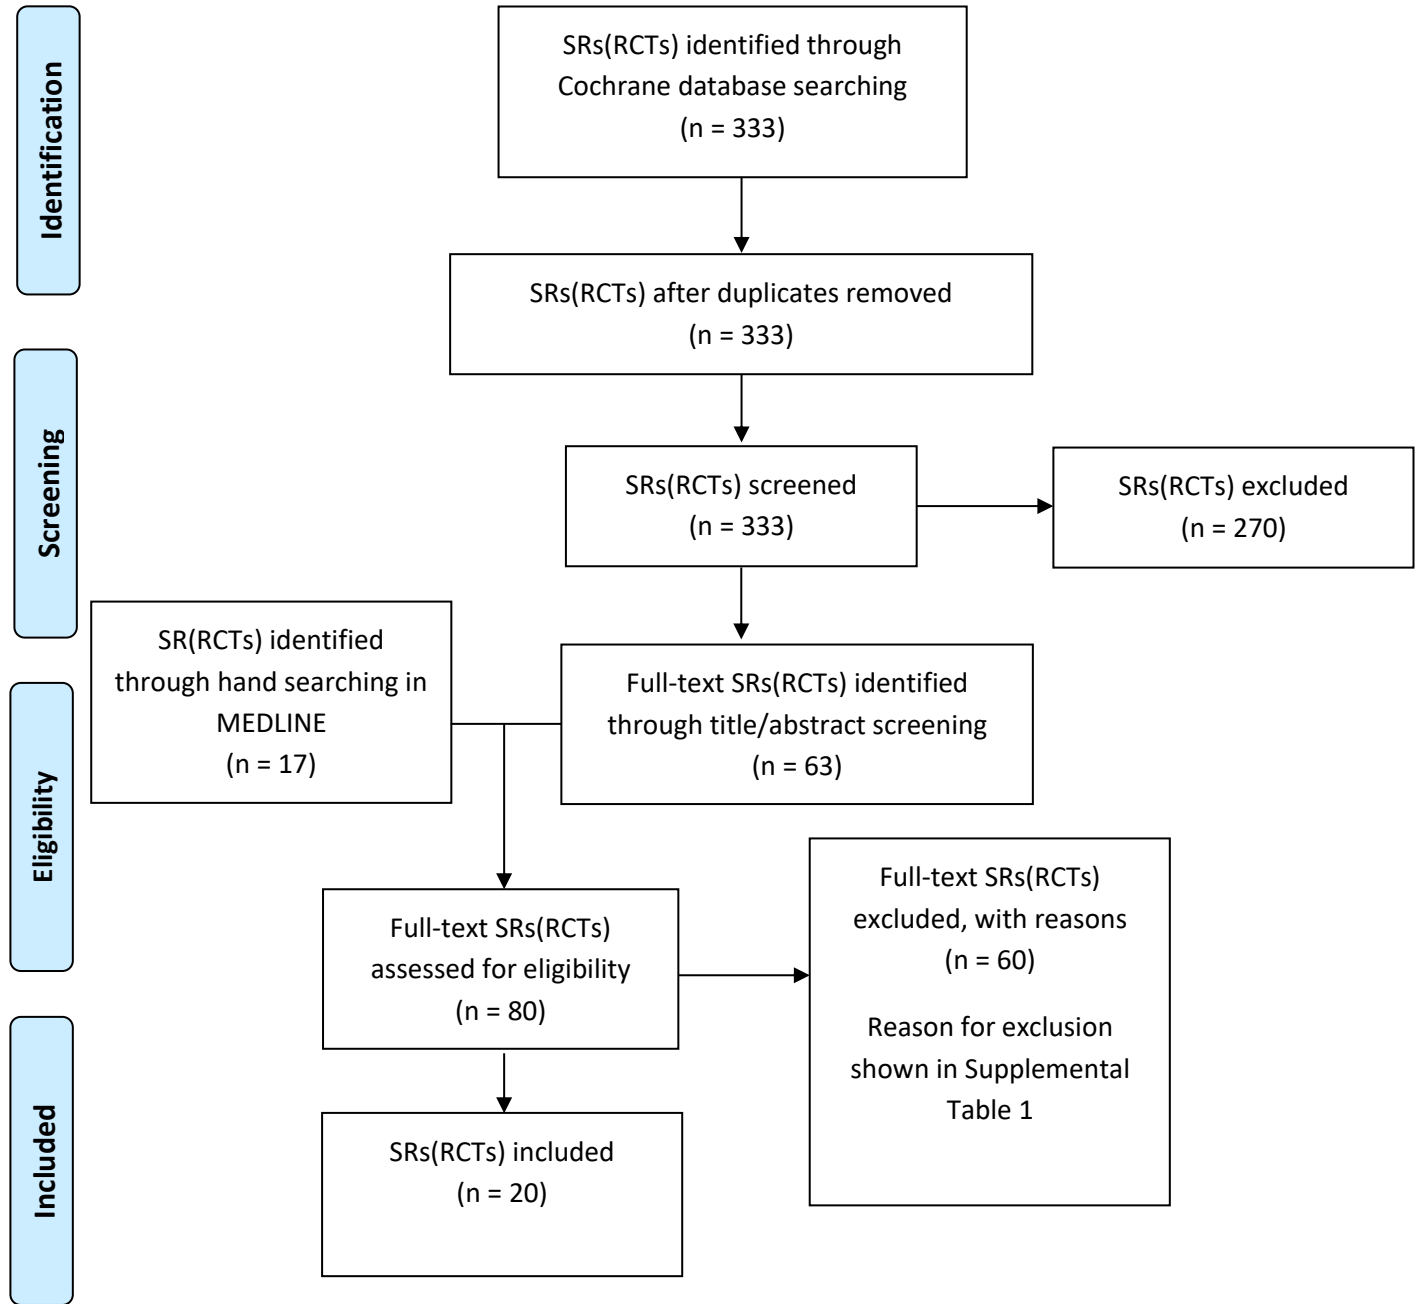

Supplemental Figure 1: Flow diagram showing study selection process for systematic reviews (SRs) of randomized controlled trials (RCTs).

Supplementary data

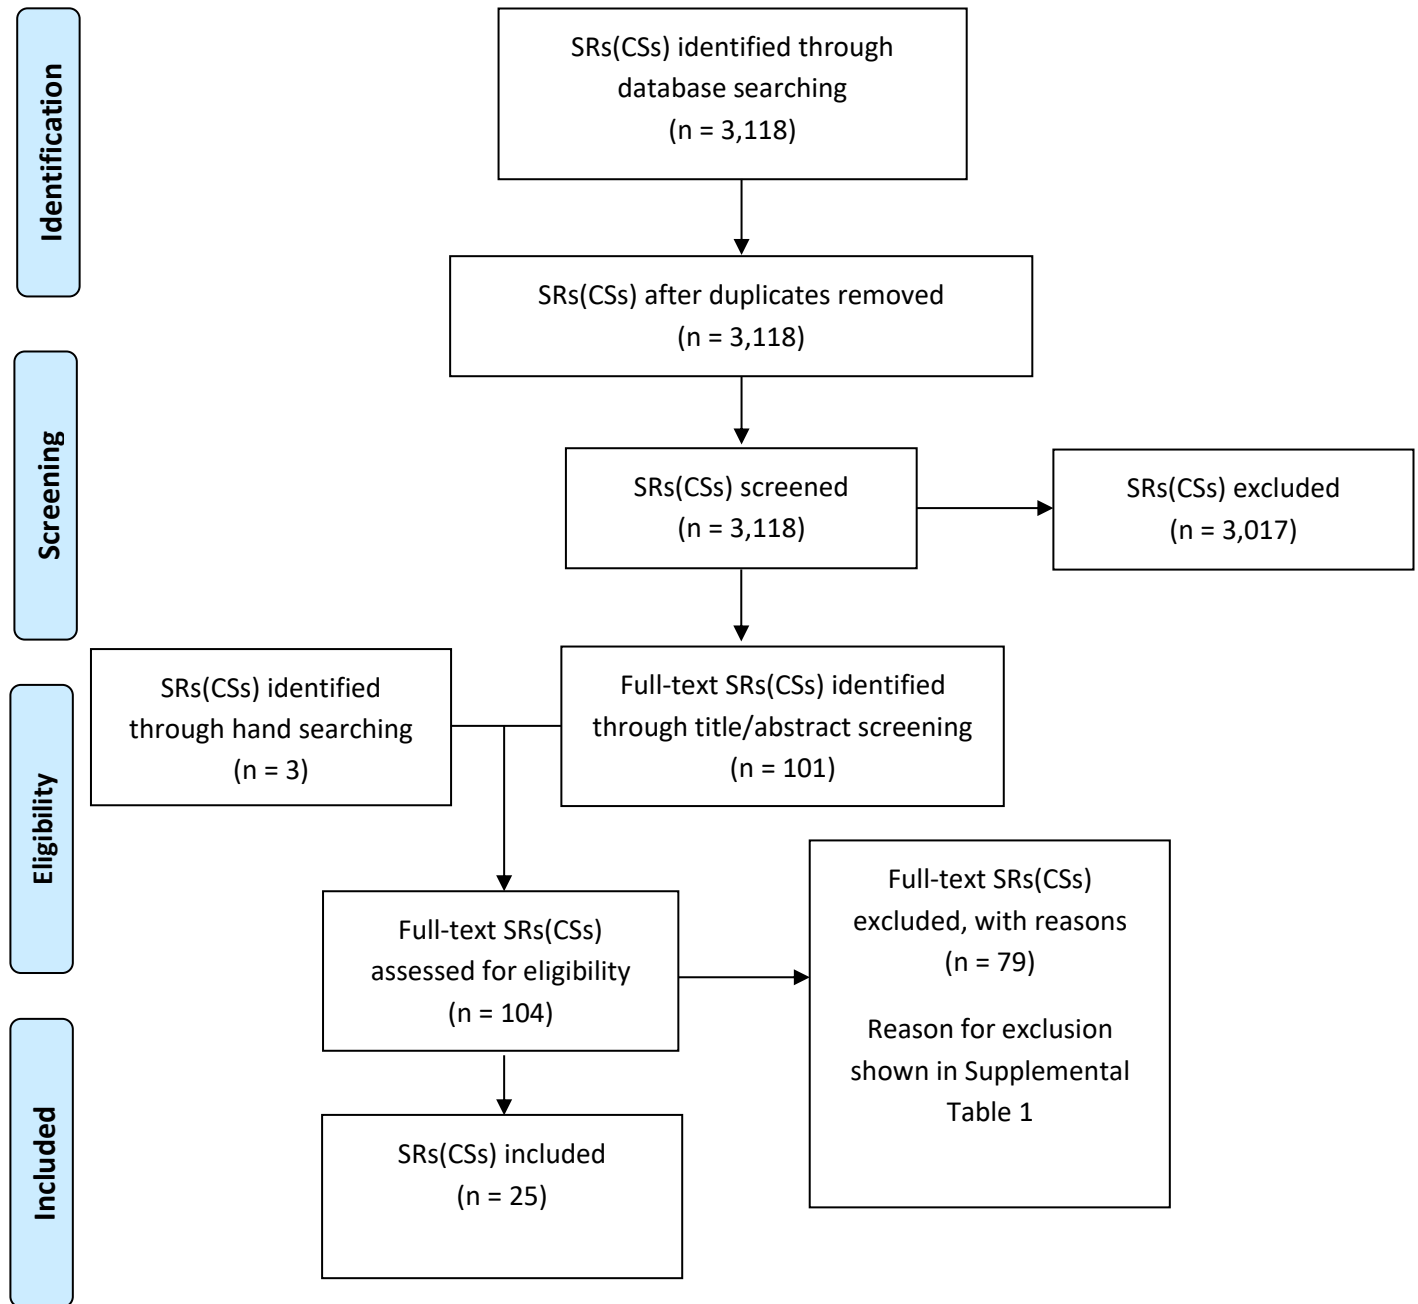

Supplemental Figure 2: Flow diagram showing study selection process for systematic reviews (SRs) of cohort studies (CSs).

Supplementary data

Supplemental Table 1: Reason for exclusion

| <b>Reference</b>                                          | <b>Reason for exclusion</b>                                                                                                                            |
|-----------------------------------------------------------|--------------------------------------------------------------------------------------------------------------------------------------------------------|
| <b>Systematic reviews of randomized controlled trials</b> |                                                                                                                                                        |
| (1-16)                                                    | Did not fulfil PICO inclusion criteria (see PICO criteria Table 1).                                                                                    |
| (17-54)                                                   | No corresponding systematic review of cohort studies on dietary intake and biomarker was available.                                                    |
| (55-60)                                                   | More recent or appropriate systematic review of randomized controlled trials available (e.g. higher number of included studies, better matching PICO). |
| <b>Systematic reviews of cohort studies</b>               |                                                                                                                                                        |
| (61-64)                                                   | Did not fulfil PECO inclusion criteria (see PECO criteria Table 1).                                                                                    |
| (65-91)                                                   | Corresponding systematic review only on dietary intake.                                                                                                |
| (92-104)                                                  | Corresponding systematic review only on biomarker or status.                                                                                           |
| (105-113)                                                 | More recent or appropriate systematic review of cohort studies available (e.g. higher number of included studies, better matching PECO).               |
| (114-139)                                                 | No body of randomized controlled trials available.                                                                                                     |

PI/ECO: population, intervention/exposure, comparator, outcome.

Supplementary data

Supplemental Table 2: Characteristics of included systematic reviews of randomized controlled trials

| Reference                         | Intervention<br>(as defined by the authors)   | Outcome<br>(as defined by the authors) | Population:<br>Mixed <sup>1</sup> or<br>General <sup>2</sup> | Studies, n | Participants | Cases  | Estimate | Effect | 95% CI |      |
|-----------------------------------|-----------------------------------------------|----------------------------------------|--------------------------------------------------------------|------------|--------------|--------|----------|--------|--------|------|
| Abdelhamid et al. 2018 (140)      | Long-chain Omega-3 supplements + intake       | Cardiovascular disease                 | Mixed                                                        | 38         | 90,378       | 14,737 | RR       | 0.99   | 0.94   | 1.04 |
| Abdelhamid et al. 2018 (140)      | Long-chain Omega-3 supplements + intake       | Cardiovascular mortality               | Mixed                                                        | 25         | 67,772       | 4,544  | RR       | 0.95   | 0.87   | 1.03 |
| Abdelhamid et al. 2018 (140)      | $\alpha$ -Linolenic acid supplements + intake | Cardiovascular disease                 | Mixed                                                        | 5          | 19,327       | 884    | RR       | 0.95   | 0.83   | 1.07 |
| Adler et al. 2014 (141)           | Low sodium intake                             | All-cause mortality                    | Mixed                                                        | 7          | 6,603        | 625    | RR       | 0.96   | 0.83   | 1.10 |
| Adler et al. 2014 (141)           | Low sodium intake                             | Cardiovascular disease                 | Mixed                                                        | 4          | 3,397        | 194    | RR       | 0.76   | 0.57   | 1.01 |
| Adler et al. 2014 (141)           | Low sodium intake                             | Cardiovascular mortality               | Mixed                                                        | 3          | 2,656        | 106    | RR       | 0.67   | 0.45   | 1.01 |
| Bjelakovic et al. 2012 (142)      | Vitamin C supplements                         | All-cause mortality                    | Mixed                                                        | 41         | 90,191       | 8,020  | RR       | 1.01   | 0.97   | 1.05 |
| Bjelakovic et al. 2012 (142)      | Vitamin E supplements                         | All-cause mortality                    | Mixed                                                        | 64         | 211,957      | 22,058 | RR       | 1.02   | 0.99   | 1.04 |
| Bjelakovic et al. 2012 (142)      | $\beta$ -carotene supplements                 | All-cause mortality                    | Mixed                                                        | 31         | 195,503      | 23,182 | RR       | 1.02   | 0.98   | 1.07 |
| Bjelakovic et al. 2014 (143)      | Vitamin D3 supplements                        | Breast cancer                          | Mixed                                                        | 7          | 43,669       | 1,135  | RR       | 0.97   | 0.86   | 1.09 |
| Bjelakovic et al. 2014 (143)      | Vitamin D3 supplements                        | Colorectal cancer                      | Mixed                                                        | 5          | 45,598       | 436    | RR       | 1.11   | 0.92   | 1.34 |
| Bjelakovic et al. 2014 (143)      | Vitamin D3 supplements                        | Lung cancer                            | Mixed                                                        | 5          | 45,509       | 329    | RR       | 0.86   | 0.69   | 1.07 |
| Brown et al. 2019 (144)           | Long-chain Omega-3 supplements + intake       | Type 2 diabetes                        | Mixed                                                        | 17         | 58,643       | 2,196  | RR       | 1.00   | 0.85   | 1.17 |
| Brown et al. 2019 (144)           | $\alpha$ -Linolenic acid supplements + intake | Type 2 diabetes                        | Mixed                                                        | 2          | 18,243       | 230    | RR       | 0.68   | 0.33   | 1.39 |
| Chowdhury et al. 2012 (145)       | Long-chain Omega-3 supplements                | Stroke                                 | Mixed                                                        | 12         | 62,040       | 1,563  | RR       | 1.03   | 0.94   | 1.12 |
| Druesne-Pecollo et al. 2010 (146) | $\beta$ -carotene supplements                 | Breast cancer                          | Mixed                                                        | 4          | 79,378       | 913    | RR       | 0.96   | 0.85   | 1.10 |
| Druesne-Pecollo et al. 2010 (146) | $\beta$ -carotene supplements                 | Cancer                                 | Mixed                                                        | 8          | 180,702      | 10,600 | RR       | 1.01   | 0.98   | 1.04 |
| Hanson et al. 2020 (147)          | Long-chain Omega-3 supplements + intake       | Breast cancer                          | Mixed                                                        | 12         | 44,295       | 661    | RR       | 1.03   | 0.89   | 1.20 |

Supplementary data

|                           |                                                 |                                |         |    |         |        |    |      |      |      |
|---------------------------|-------------------------------------------------|--------------------------------|---------|----|---------|--------|----|------|------|------|
| Hanson et al. 2020 (147)  | Long-chain Omega-3 supplements + intake         | Prostate cancer                | Mixed   | 7  | 38,525  | 1,021  | RR | 1.10 | 0.97 | 1.24 |
| Hanson et al. 2020 (147)  | Omega-6 supplements + intake                    | Breast cancer                  | General | 1  | 200     | 4      | RR | 1.00 | 0.14 | 6.96 |
| Hanson et al. 2020 (147)  | Polyunsaturated fatty acid supplements + intake | Breast cancer                  | Mixed   | 2  | 5,198   | 79     | RR | 1.11 | 0.71 | 1.73 |
| Hanson et al. 2020 (147)  | $\alpha$ -Linolenic acid supplements + intake   | Prostate cancer                | Mixed   | 2  | 4,010   | 46     | RR | 1.30 | 0.72 | 2.32 |
| Hooper et al. 2018 (148)  | Omega-6 supplements + intake                    | All-cause mortality            | Mixed   | 10 | 4,506   | 979    | RR | 1.00 | 0.88 | 1.12 |
| Hooper et al. 2018 (148)  | Omega-6 supplements + intake                    | Combined cardiovascular events | Mixed   | 7  | 4,962   | 1,404  | RR | 0.97 | 0.81 | 1.15 |
| Hooper et al. 2018 (148)  | Omega-6 supplements + intake                    | Cardiovascular mortality       | Mixed   | 7  | 4,019   | 472    | RR | 1.09 | 0.76 | 1.55 |
| Jenkins et al. 2018 (149) | Vitamin C supplements                           | Cardiovascular disease         | Mixed   | 2  | 15,497  | 1,459  | RR | 0.99 | 0.90 | 1.10 |
| Jenkins et al. 2018 (149) | Vitamin C supplements                           | Cardiovascular mortality       | Mixed   | 2  | 15,497  | 646    | RR | 1.07 | 0.92 | 1.25 |
| Jenkins et al. 2018 (149) | Vitamin C supplements                           | Stroke                         | Mixed   | 2  | 15,497  | 525    | RR | 0.92 | 0.78 | 1.09 |
| Jenkins et al. 2018 (149) | Vitamin E supplements                           | Cardiovascular disease         | Mixed   | 10 | 100,475 | 7,936  | RR | 0.96 | 0.89 | 1.03 |
| Jenkins et al. 2018 (149) | Vitamin E supplements                           | Cardiovascular mortality       | Mixed   | 11 | 102,533 | 2,887  | RR | 0.95 | 0.89 | 1.02 |
| Jenkins et al. 2018 (149) | Vitamin E supplements                           | Stroke                         | Mixed   | 11 | 100,575 | 1,956  | RR | 0.98 | 0.88 | 1.08 |
| Jenkins et al. 2018 (149) | Iron supplements                                | Cardiovascular mortality       | Mixed   | 2  | 760     | 31     | RR | 0.80 | 0.40 | 1.58 |
| Jenkins et al. 2018 (149) | Iron supplements                                | Myocardial infarction          | Mixed   | 1  | 459     | 5      | RR | 0.34 | 0.06 | 2.01 |
| Jenkins et al. 2018 (149) | $\beta$ -carotene supplements                   | Cardiovascular disease         | Mixed   | 3  | 70,118  | 2,912  | RR | 1.03 | 0.96 | 1.10 |
| Jenkins et al. 2018 (149) | $\beta$ -carotene supplements                   | Coronary heart disease         | Mixed   | 2  | 21,841  | 2,081  | RR | 1.02 | 0.94 | 1.10 |
| Jenkins et al. 2018 (149) | $\beta$ -carotene supplements                   | Stroke                         | Mixed   | 3  | 58,761  | 2,104  | RR | 1.06 | 0.95 | 1.19 |
| Khan et al. 2019 (150)    | Long-chain Omega-3 supplements                  | All-cause mortality            | Mixed   | 41 | 134,034 | 10,707 | RR | 0.98 | 0.93 | 1.02 |
| Moazzen et al. 2018 (151) | Folate supplements                              | Colorectal cancer              | NA      | NA | NA      | NA     | RR | 1.07 | 0.86 | 1.43 |
| Park et al. 2017 (152)    | Vitamin A supplements                           | Bladder cancer                 | Mixed   | 5  | 19,285  | 442    | RR | 0.86 | 0.65 | 1.13 |
| Rees et al. 2013 (153)    | Selenium supplements                            | All-cause mortality            | Mixed   | 2  | 18,452  | 1,336  | RR | 0.97 | 0.88 | 1.08 |
| Rutjes et al. 2018 (154)  | B-Vitamins supplements                          | Dementia / MCI                 | Mixed   | 1  | 1,803   | 99     | RR | 1.01 | 0.69 | 1.48 |



### Supplementary data

|                                 |                                        |                      |         |    |        |       |    |      |      |      |
|---------------------------------|----------------------------------------|----------------------|---------|----|--------|-------|----|------|------|------|
| Schwingshackl et al. 2017 (155) | Vitamin C supplements                  | Cancer               | NA      | 3  | NA     | NA    | RR | 0.99 | 0.91 | 1.06 |
| Schwingshackl et al. 2017 (155) | Vitamin E supplements                  | Cancer               | NA      | 7  | NA     | NA    | RR | 1.02 | 0.99 | 1.06 |
| van Die et al. 2014 (156)       | Soy / Isoflavones supplements + intake | Prostate cancer      | Mixed   | 2  | 122    | 32    | RR | 0.49 | 0.26 | 0.95 |
| Vinceti et al. 2018 (157)       | Selenium supplements                   | Cancer mortality     | Mixed   | 2  | 18,698 | 359   | RR | 0.81 | 0.49 | 1.32 |
| Vinceti et al. 2018 (157)       | Selenium supplements                   | Lung cancer          | Mixed   | 3  | 20,259 | 299   | RR | 1.03 | 0.78 | 1.37 |
| Vinceti et al. 2018 (157)       | Selenium supplements                   | Prostate cancer      | Mixed   | 5  | 19,869 | 1,084 | RR | 0.91 | 0.75 | 1.12 |
| Vollset et al. 2013 (158)       | Folate supplements                     | Prostate cancer      | Mixed   | 12 | 44,177 | 656   | RR | 1.15 | 0.99 | 1.34 |
| Zhao et al. 2017 (159)          | Iron supplements                       | Gestational diabetes | General | 2  | 3,858  | 439   | RR | 0.88 | 0.72 | 1.07 |

<sup>1</sup> Mixed population: Population including people with various pre-existing conditions such as cancer, cardiovascular diseases / chronic heart diseases, cognitive symptoms, diseases of the digestive system / eye / genitourinary system / liver / nervous system, endocrine / nutritional / metabolic diseases, musculoskeletal diseases.

<sup>2</sup> General population: General healthy.

MCI: mild cognitive impairment; n: number; NA: not applicable/assessed; RR: risk ratio; 95% CI: 95% confidence interval.

Supplementary data

Supplemental Table 3: Characteristics of included systematic reviews of cohort studies examining dietary intake

| Reference                   | Exposure (as defined by the authors)    | Comparison      | Outcome (as defined by the authors) | Population: Mixed <sup>1</sup> or General <sup>2</sup> | Studies, n | Participants | Cases  | Estimate | Effect | 95% CI |      |
|-----------------------------|-----------------------------------------|-----------------|-------------------------------------|--------------------------------------------------------|------------|--------------|--------|----------|--------|--------|------|
| Aburto et al. 2013 (160)    | Low sodium intake                       | Low vs. High    | All-cause mortality                 | General                                                | 2          | 22,550       | NA     | RR       | 0.95   | 0.71   | 1.27 |
| Aburto et al. 2013 (160)    | Low sodium intake                       | Low vs. High    | Cardiovascular disease              | General                                                | 3          | 81,280       | NA     | RR       | 0.87   | 0.64   | 1.18 |
| Aburto et al. 2013 (160)    | Low sodium intake                       | Low vs. High    | Cardiovascular mortality            | General                                                | 3          | 81,280       | NA     | RR       | 0.87   | 0.64   | 1.18 |
| Alexander et al. 2015 (161) | Long-chain Omega-3 intake + supplements | High vs. Low    | Prostate cancer                     | General                                                | 12         | 255,643      | NA     | RR       | 1.00   | 0.93   | 1.09 |
| Applegate et al. 2018 (162) | Soy intake                              | High vs. Low    | Prostate cancer                     | General                                                | 7          | NA           | NA     | RR       | 0.90   | 0.82   | 0.99 |
| Aune et al. 2012 (163)      | $\beta$ -carotene intake                | High vs. Low    | Breast cancer                       | General                                                | 10         | 825,911      | 18,191 | RR       | 0.93   | 0.88   | 0.98 |
| Aune et al. 2018 (164)      | Vitamin C intake                        | High vs. Low    | All-cause mortality                 | General                                                | 16         | 315,214      | 38,079 | RR       | 0.86   | 0.80   | 0.92 |
| Aune et al. 2018 (164)      | Vitamin C intake                        | High vs. Low    | Cancer                              | General                                                | 7          | 181,318      | 7,068  | RR       | 0.87   | 0.78   | 0.95 |
| Aune et al. 2018 (164)      | Vitamin C intake                        | High vs. Low    | Cardiovascular disease              | General                                                | 9          | 246,711      | 7,986  | RR       | 0.84   | 0.77   | 0.91 |
| Aune et al. 2018 (164)      | Vitamin C intake                        | Per 100 mg/d    | Cardiovascular mortality            | General                                                | 9          | NA           | NA     | RR       | 0.88   | 0.83   | 0.94 |
| Aune et al. 2018 (164)      | Vitamin C intake                        | High vs. Low    | Stroke                              | General                                                | 13         | 298,066      | 7,294  | RR       | 0.84   | 0.77   | 0.91 |
| Aune et al. 2018 (164)      | Vitamin E intake                        | High vs. Low    | All-cause mortality                 | General                                                | 9          | 229,83       | 15,321 | RR       | 0.98   | 0.93   | 1.04 |
| Aune et al. 2018 (164)      | Vitamin E intake                        | High vs. Low    | Cancer                              | General                                                | 5          | 168,182      | 5,578  | RR       | 1.01   | 0.92   | 1.10 |
| Aune et al. 2018 (164)      | Vitamin E intake                        | High vs. Low    | Cardiovascular disease              | General                                                | 8          | NA           | NA     | RR       | 0.90   | 0.78   | 1.03 |
| Aune et al. 2018 (164)      | Vitamin E intake                        | Per 5 $\mu$ g/d | Cardiovascular mortality            | General                                                | 7          | 233,310      | 7,852  | RR       | 1.00   | 0.98   | 1.02 |
| Aune et al. 2018 (164)      | Vitamin E intake                        | High vs. Low    | Stroke                              | General                                                | 10         | 311,965      | 7,003  | RR       | 0.89   | 0.78   | 1.02 |
| Aune et al. 2018 (164)      | $\beta$ -carotene intake                | High vs. Low    | All-cause mortality                 | General                                                | 8          | 142,798      | 11,729 | RR       | 0.82   | 0.78   | 0.87 |
| Aune et al. 2018 (164)      | $\beta$ -carotene intake                | High vs. Low    | Cancer                              | General                                                | 4          | 46,280       | 2,627  | RR       | 0.90   | 0.81   | 1.00 |

Supplementary data

|                              |                                   |                      |                                  |         |    |           |                         |    |      |      |      |
|------------------------------|-----------------------------------|----------------------|----------------------------------|---------|----|-----------|-------------------------|----|------|------|------|
| Aune et al. 2018 (164)       | β-carotene intake                 | High vs. Low         | Cardiovascular disease           | General | 4  | 39,643    | 1,767                   | RR | 0.98 | 0.84 | 1.15 |
| Aune et al. 2018 (164)       | β-carotene intake                 | High vs. Low         | Coronary heart disease           | General | 4  | 99,345    | 2,104                   | RR | 0.73 | 0.63 | 0.85 |
| Aune et al. 2018 (164)       | β-carotene intake                 | High vs. Low         | Stroke                           | General | 7  | 201,587   | 5,468                   | RR | 0.84 | 0.75 | 0.94 |
| Cao et al. 2016 (165)        | Omega-6 intake                    | High vs. Low         | Breast cancer                    | General | 5  | 206,521   | 8,308                   | RR | 1.10 | 0.88 | 1.38 |
| Cao et al. 2016 (165)        | Polyunsaturated fatty acid intake | High vs. Low         | Breast cancer                    | General | 16 | 1,012,099 | 33,209                  | RR | 1.05 | 0.96 | 1.14 |
| Chen et al. 2016 (166)       | Omega-3 intake + supplements      | High vs. Low         | All-cause mortality              | General | 6  | 361,273   | 27,624                  | RR | 0.91 | 0.84 | 0.98 |
| Chowdhury et al. 2012 (145)  | Long-chain Omega-3 intake         | High vs. Low         | Cerebrovascular disease          | General | 10 | 301,023   | 4,197                   | RR | 0.90 | 0.80 | 1.01 |
| Chowdhury et al. 2014 (167)  | Long-chain Omega-3 intake         | T3 vs. T1            | Coronary heart disease           | Mixed   | 16 | 422,786   | 9,089                   | RR | 0.87 | 0.78 | 0.97 |
| Chowdhury et al. 2014 (167)  | Long-chain Omega-3 intake         | T3 vs. T1            | Coronary heart disease mortality | Mixed   | NA | 104,681   | 1,483                   | RR | 0.90 | 0.70 | 1.14 |
| Chowdhury et al. 2014 (167)  | Omega-6 intake                    | High vs. Low         | Coronary heart disease           | Mixed   | 8  | 206,376   | 8,155                   | RR | 0.98 | 0.90 | 1.06 |
| Doets et al. 2013 (168)      | Vitamin B12 intake                | Per 1 µg/d           | Dementia                         | General | 3  | 5,254     | 431                     | RR | 0.99 | 0.99 | 1.00 |
| Fu et al. 2015 (169)         | α-Linolenic acid intake           | Per 0.5 g/d increase | Prostate cancer                  | General | 5  | 430,090   | 7,781                   | RR | 0.99 | 0.98 | 1.00 |
| Hossain et al. 2019 (170)    | Vitamin D supplements             | Yes vs. No           | Breast cancer                    | General | 2  | 37,707    | 1,611 (1 study unclear) | RR | 0.94 | 0.87 | 1.02 |
| Hunnicuttt et al. 2014 (171) | Iron intake                       | High vs. Low         | Coronary heart disease mortality | General | 2  | 103,548   | 694                     | RR | 0.91 | 0.69 | 1.19 |
| Hunnicuttt et al. 2014 (171) | Iron intake                       | High vs. Low         | Myocardial infarction            | General | 3  | 65,871    | 625                     | RR | 0.86 | 0.66 | 1.13 |
| Jayedi et al. 2018 (172)     | Selenium intake                   | High vs. Low         | All-cause mortality              | General | 3  | 141,404   | 10,285                  | RR | 0.79 | 0.73 | 0.85 |
| Li et al. 2020 (173)         | Linoleic acid intake              | High vs. Low         | All-cause mortality              | Mixed   | 11 | 708,379   | 170,076                 | RR | 0.87 | 0.81 | 0.94 |
| Li et al. 2020 (173)         | Linoleic acid intake              | High vs. Low         | Cardiovascular mortality         | Mixed   | 14 | 793,131   | 50,786                  | RR | 0.87 | 0.82 | 0.92 |
| Moazzen et al. 2018 (151)    | Folate                            | High vs. Low         | Colorectal cancer                | NA      | NA | NA        | NA                      | RR | 0.96 | 0.76 | 1.21 |
| Pan et al. 2012 (174)        | α-Linolenic acid intake           | High vs. Low         | Cardiovascular disease           | General | 11 | 328,888   | 9,161                   | RR | 0.93 | 0.85 | 1.03 |

### Supplementary data

|                           |                                                     |              |                      |         |    |         |        |    |      |      |      |
|---------------------------|-----------------------------------------------------|--------------|----------------------|---------|----|---------|--------|----|------|------|------|
| Touvier et al. 2011 (175) | Vitamin D intake                                    | Per 100 IU/d | Colorectal cancer    | General | 10 | NA      | NA     | RR | 0.95 | 0.93 | 0.98 |
| Vinceti et al. 2018 (157) | Selenium intake                                     | High vs. Low | Cancer mortality     | General | 1  | 133,957 | 2,603  | OR | 0.93 | 0.83 | 1.04 |
| Vinceti et al. 2018 (157) | Selenium intake                                     | High vs. Low | Lung cancer          | General | 2  | 6,313   | 274    | OR | 1.32 | 0.95 | 1.84 |
| Vinceti et al. 2018 (157) | Selenium intake + supplements                       | High vs. Low | Prostate cancer      | Mixed   | 4  | 162,566 | 8,896  | OR | 0.99 | 0.85 | 1.15 |
| Wang et al. 2014 (176)    | Folate intake                                       | High vs. Low | Prostate cancer      | General | 5  | 192,702 | NA     | RR | 1.02 | 0.95 | 1.09 |
| Wu et al. 2012 (177)      | Docosahexaenoic acid + Eicosapentaenoic acid intake | High vs. Low | Type 2 diabetes      | General | 12 | 523,938 | 23,739 | RR | 1.04 | 0.94 | 1.16 |
| Wu et al. 2012 (177)      | $\alpha$ -Linolenic acid intake                     | High vs. Low | Type 2 diabetes      | General | 7  | 131,940 | 7,365  | RR | 0.92 | 0.80 | 1.05 |
| Wu et al. 2020 (178)      | Carotenoids intake                                  | High vs. Low | Bladder cancer       | General | 4  | 353,321 | NA     | RR | 1.09 | 0.93 | 1.27 |
| Zhang et al. 2015 (179)   | Vitamin D intake                                    | High vs. Low | Lung cancer          | Mixed   | 3  | 135,244 | 3,004  | RR | 0.89 | 0.74 | 1.06 |
| Zhao et al. 2017 (159)    | Iron supplements                                    | Yes vs. No   | Gestational diabetes | General | 2  | 14,475  | 1,367  | RR | 1.75 | 0.56 | 5.47 |
| Zheng et al. 2013 (180)   | Marine Omega-3 intake                               | High vs. Low | Breast cancer        | General | 10 | 443,616 | 11,519 | RR | 0.85 | 0.76 | 0.96 |

<sup>1</sup> Mixed population: Population including people with various pre-existing conditions such as cancer, cardiovascular diseases / chronic heart diseases, cognitive symptoms, diseases of the digestive system / eye / genitourinary system / liver / nervous system, endocrine / nutritional / metabolic diseases, musculoskeletal diseases.

<sup>2</sup> General population: General healthy.

d: day; g: gram; IU: international unit; mg: milligram;  $\mu$ g: microgram; n: number; NA: not applicable/assessed; OR: odds ratio; RR: risk ratio; T: tertile; vs: versus; 95% CI: 95% confidence interval

## Supplementary data

Supplemental Table 4: Characteristics of included systematic reviews of cohort studies examining biomarkers

| Reference                   | Exposure (as defined by the authors) | Comparison         | Outcome (as defined by the authors) | Population: Mixed <sup>1</sup> or General <sup>2</sup> | Studies, n | Participants           | Cases                 | Estimate | Effect | 95% CI |      |
|-----------------------------|--------------------------------------|--------------------|-------------------------------------|--------------------------------------------------------|------------|------------------------|-----------------------|----------|--------|--------|------|
| Aburto et al. 2013 (160)    | Low urinary sodium excretion         | Low vs. High       | All-cause mortality                 | Mixed                                                  | 5          | 34,494                 | NA                    | RR       | 0.94   | 0.82   | 1.09 |
| Aburto et al. 2013 (160)    | Low urinary sodium excretion         | Low vs. High       | Cardiovascular disease              | Mixed                                                  | 6          | 37,431                 | NA                    | RR       | 0.91   | 0.71   | 1.15 |
| Aburto et al. 2013 (160)    | Low urinary sodium excretion         | Low vs. High       | Cardiovascular mortality            | Mixed                                                  | 4          | 32,079                 | NA                    | RR       | 0.98   | 0.73   | 1.32 |
| Alexander et al. 2015 (161) | Omega-3 biomarkers                   | High vs. Low       | Prostate cancer                     | General                                                | 9          | 14,807                 | 5,750                 | RR       | 1.07   | 0.94   | 1.20 |
| Applegate et al. 2018 (162) | Genistein (serum + plasma)           | High vs. Low       | Prostate cancer                     | General                                                | 6          | NA                     | NA                    | RR       | 0.97   | 0.83   | 1.13 |
| Aune et al. 2012 (163)      | $\beta$ -carotene biomarkers         | High vs. Low       | Breast cancer                       | General                                                | 13         | 14,212 (NA in 1 study) | 3,987 (NA in 1 study) | RR       | 0.82   | 0.64   | 1.04 |
| Aune et al. 2018 (164)      | Vitamin C biomarkers                 | High vs. Low       | All-cause mortality                 | General                                                | 8          | 47,238                 | 7,528                 | RR       | 0.68   | 0.60   | 0.77 |
| Aune et al. 2018 (164)      | Vitamin C biomarkers                 | High vs. Low       | Cancer                              | General                                                | 5          | 47,678                 | 1,831                 | RR       | 0.68   | 0.57   | 0.80 |
| Aune et al. 2018 (164)      | Vitamin C biomarkers                 | High vs. Low       | Cardiovascular disease              | General                                                | 5          | 45,273                 | 2,792                 | RR       | 0.61   | 0.45   | 0.83 |
| Aune et al. 2018 (164)      | Vitamin C biomarkers                 | Per 50 $\mu$ mol/L | Cardiovascular mortality            | General                                                | 5          | NA                     | NA                    | RR       | 0.75   | 0.64   | 0.88 |
| Aune et al. 2018 (164)      | Vitamin C biomarkers                 | High vs. Low       | Stroke                              | General                                                | 5          | 27,843                 | 957                   | RR       | 0.60   | 0.49   | 0.73 |
| Aune et al. 2018 (164)      | Vitamin E biomarkers                 | High vs. Low       | All-cause mortality                 | General                                                | 6          | 47,853                 | 18,316                | RR       | 0.89   | 0.72   | 1.08 |
| Aune et al. 2018 (164)      | Vitamin E biomarkers                 | High vs. Low       | Cancer                              | General                                                | 10         | 56,258                 | 7,201                 | RR       | 0.80   | 0.74   | 0.87 |
| Aune et al. 2018 (164)      | Vitamin E biomarkers                 | High vs. Low       | Cardiovascular disease              | General                                                | 6          | 47,012                 | 8,053                 | RR       | 0.79   | 0.56   | 1.10 |
| Aune et al. 2018 (164)      | Vitamin E biomarkers                 | Per 500 $\mu$ g/dl | Cardiovascular mortality            | General                                                | 6          | NA                     | NA                    | RR       | 0.98   | 0.89   | 1.06 |
| Aune et al. 2018 (164)      | Vitamin E biomarkers                 | High vs. Low       | Stroke                              | General                                                | 5          | 69,569                 | 1,966                 | RR       | 0.71   | 0.58   | 0.85 |
| Aune et al. 2018 (164)      | $\beta$ -carotene biomarkers         | High vs. Low       | All-cause mortality                 | General                                                | 7          | 23,141                 | 5,659                 | RR       | 0.68   | 0.55   | 0.83 |

Supplementary data

|                             |                                                         |                             |                                  |         |    |                         |       |    |      |      |      |
|-----------------------------|---------------------------------------------------------|-----------------------------|----------------------------------|---------|----|-------------------------|-------|----|------|------|------|
| Aune et al. 2018 (164)      | β-carotene biomarkers                                   | High vs. Low                | Cancer                           | General | 6  | 36,812                  | 2,654 | RR | 0.76 | 0.65 | 0.89 |
| Aune et al. 2018 (164)      | β-carotene biomarkers                                   | High vs. Low                | Cardiovascular disease           | General | 7  | 34,090                  | 3,232 | RR | 0.71 | 0.57 | 0.88 |
| Aune et al. 2018 (164)      | β-carotene biomarkers                                   | High vs. Low                | Coronary heart disease           | General | 4  | 3,179                   | 1,128 | RR | 0.73 | 0.57 | 0.94 |
| Aune et al. 2018 (164)      | β-carotene biomarkers                                   | High vs. Low                | Stroke                           | General | 3  | 30,144                  | 1,548 | RR | 0.85 | 0.71 | 1.01 |
| Cao et al. 2016 (165)       | Serum Omega-6                                           | High vs. Low                | Breast cancer                    | General | 7  | 3,511                   | 1,334 | RR | 0.84 | 0.60 | 1.18 |
| Cao et al. 2016 (165)       | Serum PUFA                                              | High vs. Low                | Breast cancer                    | General | 4  | 1,475                   | 645   | RR | 0.59 | 0.27 | 1.30 |
| Chen et al. 2016 (166)      | Eicosapentaenoic acid biomarkers                        | High vs. Low                | All-cause mortality              | General | 3  | 6,410                   | 3,205 | RR | 0.74 | 0.60 | 0.90 |
| Chowdhury et al. 2012 (145) | Long-chain Omega-3 biomarkers                           | High vs. Low                | Stroke                           | General | 4  | 4,096                   | 1,177 | RR | 1.04 | 0.90 | 1.20 |
| Chowdhury et al. 2014 (167) | Docosahexaenoic acid + Eicosapentaenoic acid biomarkers | T3 vs. T1                   | Coronary heart disease mortality | Mixed   | NA | 2,441                   | 223   | RR | 0.70 | 0.53 | 0.91 |
| Chowdhury et al. 2014 (167) | Long-chain Omega-3 biomarkers                           | T3 vs. T1                   | Coronary heart disease           | General | 4  | 10,558                  | 2,753 | RR | 0.84 | 0.63 | 1.11 |
| Chowdhury et al. 2014 (167) | Omega-6 biomarkers                                      | T3 vs. T1                   | Coronary heart disease           | General | 2  | 7,432                   | 1,877 | RR | 0.94 | 0.84 | 1.06 |
| Doets et al. 2013 (168)     | Vitamin B12 (serum + plasma)                            | Per 50 pmol/L               | Dementia                         | General | 4  | 2,630                   | 263   | RR | 1.00 | 0.98 | 1.02 |
| Fu et al. 2015 (169)        | α-Linolenic acid biomarkers                             | Per 0.1% increase           | Prostate cancer                  | General | 9  | 563,233 (NA in 1 study) | 5,750 | RR | 1.00 | 0.98 | 1.03 |
| Hossain et al. 2019 (170)   | Plasma Vitamin D                                        | Not deficient vs. deficient | Breast cancer                    | General | 1  | 1,414                   | 707   | OR | 1.02 | 0.68 | 1.54 |
| Hunnicutt et al. 2014 (171) | Serum ferritin                                          | High vs. Low                | Coronary heart disease mortality | General | 2  | 6,039                   | 1,503 | RR | 1.00 | 0.76 | 1.31 |
| Hunnicutt et al. 2014 (171) | Serum ferritin                                          | High vs. Low                | Myocardial infarction            | General | 1  | 1,931                   | 51    | RR | 2.20 | 1.20 | 4.02 |
| Jayed et al. 2018 (172)     | Selenium (serum + plasma)                               | High vs. Low                | All-cause mortality              | General | 7  | 23,516                  | 6,623 | RR | 0.62 | 0.45 | 0.79 |
| Li et al. 2020 (173)        | Linoleic acid (serum + plasma)                          | High vs. Low                | All-cause mortality              | Mixed   | 3  | 4,813                   | 1,712 | RR | 0.86 | 0.76 | 0.97 |
| Li et al. 2020 (173)        | Linoleic acid (serum + plasma)                          | High vs. Low                | Cardiovascular mortality         | Mixed   | 4  | 8,348                   | 1,093 | RR | 0.78 | 0.67 | 0.91 |

Supplementary data

|                           |                                                         |              |                        |         |    |         |       |    |      |      |      |
|---------------------------|---------------------------------------------------------|--------------|------------------------|---------|----|---------|-------|----|------|------|------|
| Moazzen et al. 2018 (151) | Folate biomarkers                                       | High vs. Low | Colorectal cancer      | NA      | NA | NA      | NA    | RR | 0.71 | 0.59 | 0.86 |
| Pan et al. 2012 (174)     | $\alpha$ -Linolenic acid biomarkers                     | High vs. Low | Cardiovascular disease | General | 14 | 25,108  | 8,001 | RR | 0.88 | 0.74 | 1.05 |
| Touvier et al. 2011 (175) | Vitamin D biomarkers                                    | Per 100 IU/L | Colorectal cancer      | General | 6  | NA      | NA    | RR | 0.96 | 0.94 | 0.97 |
| Vinceti et al. 2018 (157) | Selenium biomarkers                                     | High vs. Low | Cancer mortality       | Mixed   | 6  | 45,864  | 1,343 | OR | 0.63 | 0.39 | 1.02 |
| Vinceti et al. 2018 (157) | Selenium (serum + plasma)                               | High vs. Low | Lung cancer            | Mixed   | 9  | 185,472 | 1,225 | OR | 0.91 | 0.70 | 1.18 |
| Vinceti et al. 2018 (157) | Selenium (serum + plasma)                               | High vs. Low | Prostate               | Mixed   | 13 | 335,237 | 4,990 | OR | 0.86 | 0.75 | 0.99 |
| Wang et al. 2014 (176)    | Serum folate                                            | High vs. Low | Prostate cancer        | General | 5  | 9,810   | NA    | RR | 1.21 | 1.05 | 1.39 |
| Wu et al. 2012 (177)      | Docosahexaenoic acid + Eicosapentaenoic acid biomarkers | High vs. Low | Type 2 diabetes        | General | 5  | 10,382  | 1,581 | RR | 0.94 | 0.82 | 1.09 |
| Wu et al. 2012 (177)      | $\alpha$ -Linolenic acid biomarkers                     | High vs. Low | Type 2 diabetes        | General | 6  | 13,291  | 1,833 | RR | 0.87 | 0.74 | 1.01 |
| Wu et al. 2020 (178)      | Carotenoids (serum + plasma)                            | High vs. Low | Bladder cancer         | General | 2  | 1,757   | NA    | RR | 0.65 | 0.42 | 1.02 |
| Zhang et al. 2015 (179)   | Serum Vitamin D                                         | High vs. Low | Lung cancer            | General | 9  | 153,534 | 2,404 | RR | 0.83 | 0.77 | 0.90 |
| Zhao et al. 2017 (159)    | Serum ferritin                                          | High vs. Low | Gestational diabetes   | General | 4  | 5,399   | 507   | RR | 1.62 | 1.14 | 2.30 |
| Zheng et al. 2013 (180)   | Omega-3 biomarkers                                      | High vs. Low | Breast cancer          | General | 7  | 4,529   | 1,485 | RR | 0.86 | 0.71 | 1.03 |

<sup>1</sup> Mixed population: Population including people with various pre-existing conditions such as cancer, cardiovascular diseases / chronic heart diseases, cognitive symptoms, diseases of the digestive system / eye / genitourinary system / liver / nervous system, endocrine / nutritional / metabolic diseases, musculoskeletal diseases.

<sup>2</sup> General population: General healthy.

dl: deciliter; IU: international unit; L: liter;  $\mu$ g: microgram; mL: milliliter;  $\mu$ mol: micromole; n: number; NA: not applicable/assessed; ng: nanogram; OR: odds ratio; pmol: picomole; RR: risk ratio; T: tertile; vs: versus; CI: 95% confidence interval

Supplementary data

Supplemental Table 5: Methodological quality assessment of the included systematic reviews.

| Reference                         | 1   | 2           | 3   | 4           | 5   | 6   | 7           | 8           | 9   | 10  | 11  | 12  | 13  | 14  | 15  | 16  | Overall confidence | Search period   |
|-----------------------------------|-----|-------------|-----|-------------|-----|-----|-------------|-------------|-----|-----|-----|-----|-----|-----|-----|-----|--------------------|-----------------|
| Abdelhamid et al. 2018 (140)      | Yes | Yes         | Yes | Yes         | Yes | Yes | Partial Yes | Yes         | Yes | Yes | Yes | Yes | Yes | Yes | Yes | Yes | High               | 1946-04/2017    |
| Aburto et al. 2013 (160)          | Yes | Partial Yes | Yes | Yes         | Yes | Yes | No          | Yes         | Yes | No  | Yes | Yes | Yes | Yes | Yes | Yes | Low                | Until 08/2011   |
| Adler et al. 2014 (141)           | Yes | Yes         | Yes | Partial Yes | Yes | Yes | Yes         | Yes         | Yes | Yes | Yes | Yes | Yes | Yes | No  | No  | Low                | 1806-05/2013    |
| Alexander et al. 2015 (161)       | Yes | No          | Yes | No          | No  | No  | No          | Partial Yes | No  | No  | Yes | No  | No  | No  | Yes | No  | Critically low     | Until 2013      |
| Applegate et al. 2018 (162)       | Yes | No          | Yes | No          | Yes | No  | No          | Yes         | Yes | No  | Yes | Yes | Yes | No  | Yes | Yes | Critically low     | Until 05/2017   |
| Aune et al. 2012 (163)            | No  | Yes         | Yes | No          | Yes | Yes | No          | Yes         | No  | No  | Yes | No  | No  | No  | No  | Yes | Critically low     | Until 08/2011   |
| Aune et al. 2018 (164)            | Yes | No          | Yes | Partial Yes | No  | No  | Yes         | Yes         | Yes | No  | Yes | Yes | No  | No  | Yes | Yes | Critically low     | Until 02/2018   |
| Bjelakovic et al. 2012 (142)      | Yes | Yes         | No  | Yes         | Yes | Yes | Yes         | Yes         | Yes | Yes | Yes | Yes | Yes | Yes | Yes | Yes | High               | 1945-02/2011    |
| Bjelakovic et al. 2014 (143)      | Yes | Yes         | No  | Yes         | Yes | Yes | Yes         | Yes         | Yes | Yes | Yes | Yes | Yes | Yes | Yes | Yes | High               | Until 02/2014   |
| Brown et al. 2019 (144)           | Yes | Yes         | No  | Yes         | Yes | Yes | No          | Yes         | Yes | Yes | Yes | Yes | Yes | Yes | Yes | Yes | Low                | Until 12/2018   |
| Cao et al. 2016 (165)             | No  | No          | No  | No          | Yes | No  | No          | Partial Yes | Yes | No  | No  | Yes | Yes | No  | Yes | Yes | Critically low     | Until 09/2015   |
| Chen et al. 2016 (166)            | Yes | No          | Yes | Partial Yes | Yes | Yes | Partial Yes | Partial Yes | Yes | No  | Yes | No  | No  | No  | Yes | Yes | Critically low     | 01/1966-11/2015 |
| Chowdhury et al. 2012 (145)       | Yes | No          | Yes | Partial Yes | Yes | Yes | No          | Yes         | No  | No  | Yes | No  | No  | No  | Yes | Yes | Critically low     | Until 09/2012   |
| Chowdhury et al. 2014 (167)       | Yes | Partial Yes | Yes | Yes         | No  | Yes | No          | Yes         | Yes | No  | Yes | Yes | Yes | Yes | Yes | No  | Low                | Until 07/2013   |
| Doets et al. 2013 (168)           | Yes | No          | Yes | No          | No  | No  | No          | Yes         | No  | Yes | Critically low     | Until 02/2009   |
| Druesne-Pecollo et al. 2010 (146) | Yes | No          | Yes | No          | Yes | Yes | No          | Yes         | No  | No  | Yes | No  | No  | No  | No  | No  | Critically low     | Until 04/2009   |
| Fu et al. 2015 (169)              | Yes | No          | No  | No          | Yes | Yes | No          | Yes         | Yes | No  | Yes | No  | No  | Yes | Yes | Yes | Critically low     | Until 02/2014   |
| Hanson et al. 2020 (147)          | Yes | Yes         | No  | Yes         | Yes | Yes | No          | Yes         | Yes | No  | Yes | Yes | Yes | Yes | Yes | Yes | Low                | Until 12/2018   |
| Hooper et al. 2018 (148)          | Yes | Yes         | Yes | Yes         | Yes | Yes | Yes         | Yes         | Yes | Yes | Yes | Yes | Yes | Yes | Yes | Yes | High               | 1946-05/2017    |



Supplementary data

|                                 |     |             |     |             |     |     |             |             |     |     |     |     |     |     |     |     |                |                 |
|---------------------------------|-----|-------------|-----|-------------|-----|-----|-------------|-------------|-----|-----|-----|-----|-----|-----|-----|-----|----------------|-----------------|
| Hossain et al. 2019 (170)       | Yes | No          | No  | No          | Yes | No  | No          | Yes         | No  | No  | No  | No  | No  | No  | Yes | Yes | Critically low | 01/2000-03/2018 |
| Hunnicuttt et al. 2014 (171)    | Yes | No          | Yes | No          | Yes | Yes | No          | Yes         | No  | No  | Yes | No  | No  | No  | Yes | Yes | Critically low | Until 06/2013   |
| Jayedi et al. 2018 (172)        | Yes | No          | Yes | No          | Yes | Yes | No          | Partial Yes | Yes | No  | Yes | Yes | Yes | Yes | Yes | Yes | Critically low | 1966-10/2017    |
| Jenkins et al. 2018 (149)       | Yes | No          | No  | No          | Yes | Yes | No          | Yes         | Yes | Yes | Yes | Yes | Yes | Yes | Yes | No  | Critically low | 01/2012-10/2017 |
| Khan et al. 2019 (150)          | Yes | No          | No  | No          | Yes | Yes | No          | Yes         | Yes | No  | No  | No  | Yes | Yes | Yes | Yes | Critically low | Until 03/2019   |
| Li et al. 2020 (173)            | Yes | No          | Yes | No          | No  | Yes | No          | No          | Yes | No  | Yes | Yes | No  | Yes | Yes | Yes | Critically low | Until 07/2019   |
| Moazzen et al. 2018 (151)       | No  | No          | Yes | No          | No  | No  | No          | Partial Yes | Yes | No  | Yes | Yes | Yes | Yes | Yes | Yes | Critically low | 01/2000-09/2016 |
| Pan et al. 2012 (174)           | Yes | No          | Yes | No          | Yes | Yes | No          | Yes         | Yes | No  | Yes | Yes | No  | No  | Yes | Yes | Critically low | 1947-01/2012    |
| Park et al. 2017 (152)          | Yes | No          | No  | Partial Yes | Yes | No  | No          | Yes         | Yes | No  | Yes | Yes | No  | No  | Yes | Yes | Critically low | Until 07/2016   |
| Rees et al. 2013 (153)          | Yes | Yes         | No  | Yes         | Yes | Yes | Partial Yes | Yes         | Yes | No  | Yes | Yes | Yes | Yes | Yes | Yes | Moderate       | 1806-10/2012    |
| Rutjes et al. 2018 (154)        | Yes | Yes         | Yes | Yes         | Yes | Yes | Yes         | Yes         | Yes | Yes | Yes | Yes | Yes | Yes | No  | Yes | High           | Until 01/2018   |
| Schwingshackl et al. 2017 (155) | Yes | Yes         | No  | Partial Yes | Yes | No  | No          | Yes         | Yes | Yes | Yes | Yes | Yes | Yes | Yes | Yes | Low            | 1966-08/2016    |
| Touvier et al. 2011 (175)       | Yes | Partial Yes | Yes | No          | No  | No  | No          | Partial Yes | No  | No  | Yes | No  | No  | Yes | Yes | Yes | Critically low | Until 06/2010   |
| van Die et al. 2014 (156)       | Yes | No          | No  | Partial Yes | Yes | Yes | No          | Yes         | Yes | Yes | Yes | Yes | Yes | Yes | No  | No  | Critically low | Until 02/2013   |
| Vinceti et al. 2018 (157)       | Yes | Yes         | Yes | Yes         | Yes | No  | Yes         | Yes         | Yes | No  | Yes | Yes | Yes | Yes | Yes | Yes | Moderate       | Until 02/2017   |
| Vollset et al. 2013 (158)       | Yes | No          | No  | No          | No  | No  | No          | Partial Yes | No  | No  | No  | No  | No  | Yes | No  | Yes | Critically low | Until 12/2010   |
| Wang et al. 2014 (176)          | Yes | No          | No  | Partial Yes | Yes | Yes | No          | Partial Yes | Yes | No  | Yes | No  | No  | Yes | Yes | Yes | Critically low | Until 01/2014   |
| Wu et al. 2012 (177)            | Yes | No          | No  | Partial Yes | No  | Yes | Yes         | Yes         | Yes | No  | Yes | No  | No  | Yes | Yes | Yes | Critically low | Until 06/2011   |
| Wu et al. 2020 (178)            | Yes | Yes         | No  | Partial Yes | No  | Yes | No          | Yes         | Yes | No  | Yes | Yes | Yes | Yes | Yes | Yes | Low            | Until 04/2019   |
| Zhang et al. 2015 (179)         | Yes | No          | No  | Partial Yes | Yes | Yes | Partial Yes | No          | Yes | No  | Yes | No  | No  | Yes | Yes | No  | Critically low | Until 10/2014   |
| Zhao et al. 2017 (159)          | Yes | No          | Yes | No          | Yes | Yes | No          | Partial Yes | Yes | No  | Yes | Yes | No  | Yes | Yes | Yes | Critically low | Until 05/2016   |

### Supplementary data

|                            |     |    |     |    |     |     |    |     |     |    |     |     |    |    |     |     |                |                  |
|----------------------------|-----|----|-----|----|-----|-----|----|-----|-----|----|-----|-----|----|----|-----|-----|----------------|------------------|
| Zheng et al. 2013<br>(180) | Yes | No | Yes | No | Yes | Yes | No | Yes | Yes | No | Yes | Yes | No | No | Yes | Yes | Critically low | Until<br>12/2012 |
|----------------------------|-----|----|-----|----|-----|-----|----|-----|-----|----|-----|-----|----|----|-----|-----|----------------|------------------|

Items:

1. Did the research question and inclusion criteria for the review include the components of PICO?
2. Did the report of the review contain an explicit statement that the review methods were established prior to the conduct of the review and did the report justify any significant deviations from the protocol?
3. Did the review authors explain their selection of the study designs for inclusion in the review?
4. Did the review authors use a comprehensive literature search strategy?
5. Did the review authors perform study selection in duplicate?
6. Did the review authors perform data extraction in duplicate?
7. Did the review authors provide a list of excluded studies and justify the exclusions?
8. Did the review authors describe the included studies in adequate detail?
9. Did the review authors use a satisfactory technique for assessing the risk of bias (RoB) in individual studies that were included in the review?
10. Did the review authors report on the source of funding for the studies included in the review?
11. If meta-analysis was performed, did the review authors use appropriate methods for statistical combination of results?
12. If meta-analysis was performed, did the review authors assess the potential impact of RoB in individual studies on the results of the meta-analysis or other evidence synthesis?
13. Did the review authors account for RoB in individual studies when interpreting/discussing the results of the review?
14. Did the review authors provide a satisfactory explanation for, and discussion of, any heterogeneity observed in the results of the review?
15. If they performed quantitative synthesis, did the review authors carry out an adequate investigation of publication bias (small study bias) and discuss its likely impact on the results of the review?
16. Did the review authors report any potential sources of conflict of interest, including any funding they received for conducting the review?

Supplementary data

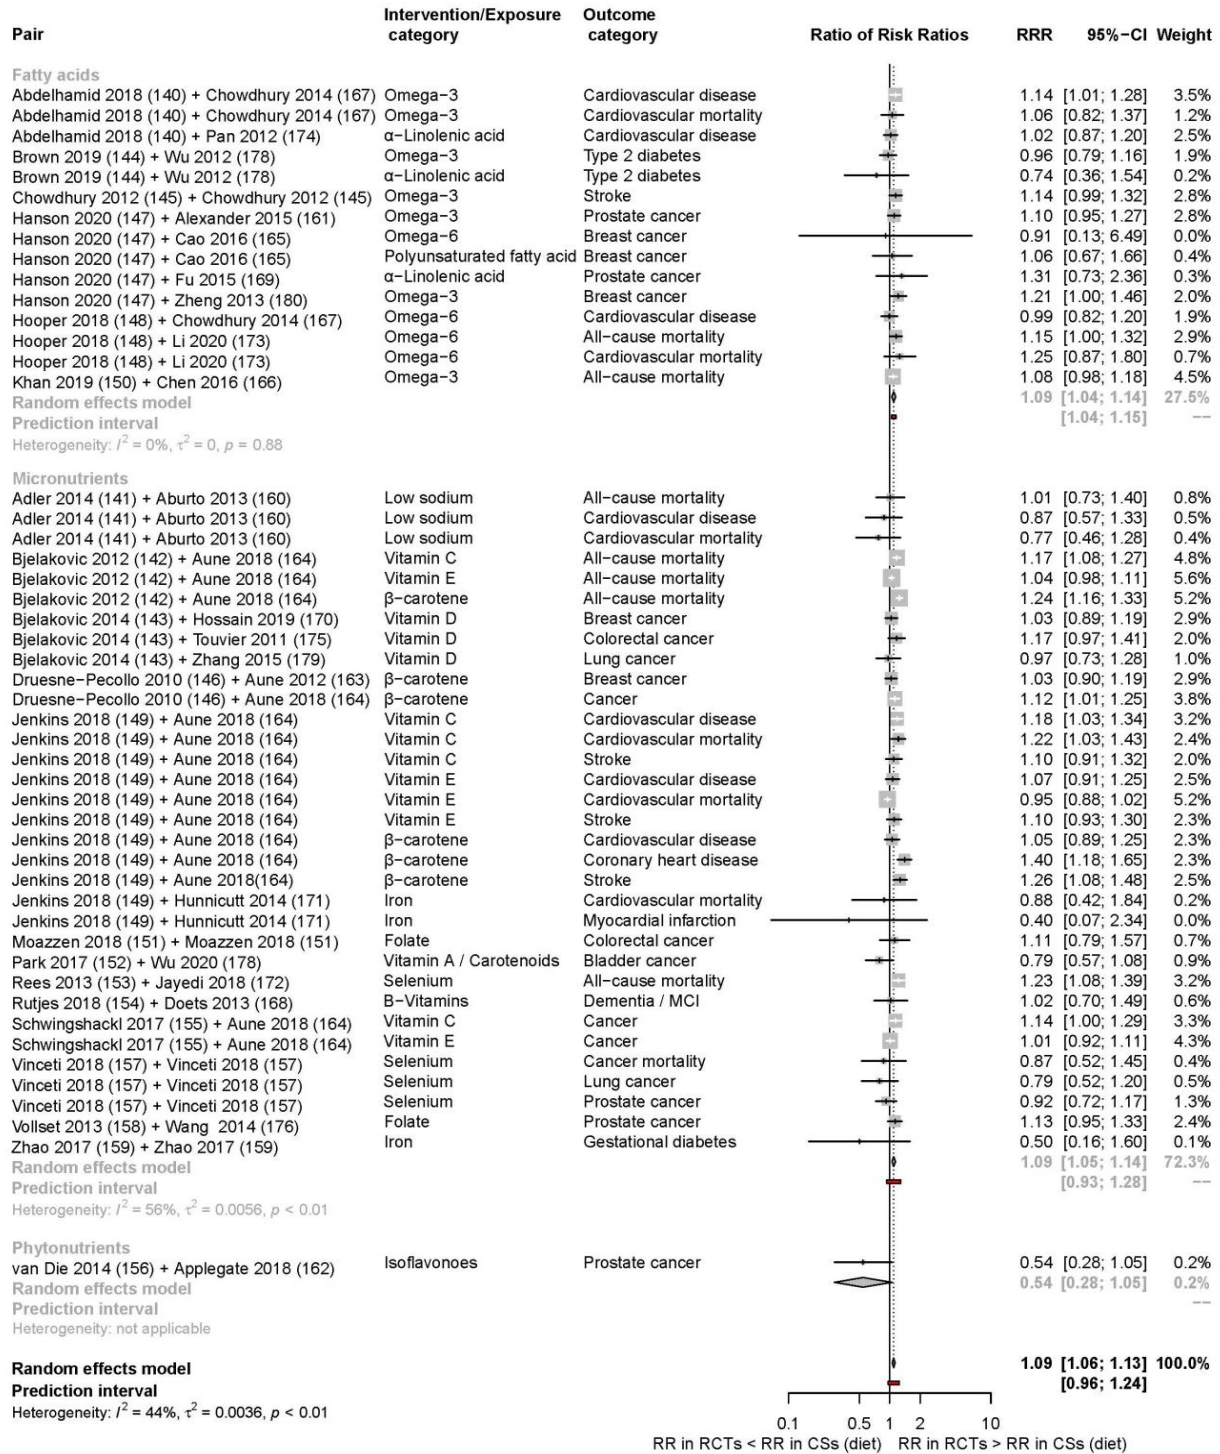

Supplemental Figure 3: Concordance analysis stratified by type of intervention/exposure (RCTs vs. CSs dietary intake).

CSs: cohort studies; MCI: mild cognitive impairment; RCTs: randomized controlled trials; RR: risk ratio; RRR: ratio of risk ratios; 95% CI: 95% confidence interval

## Supplementary data

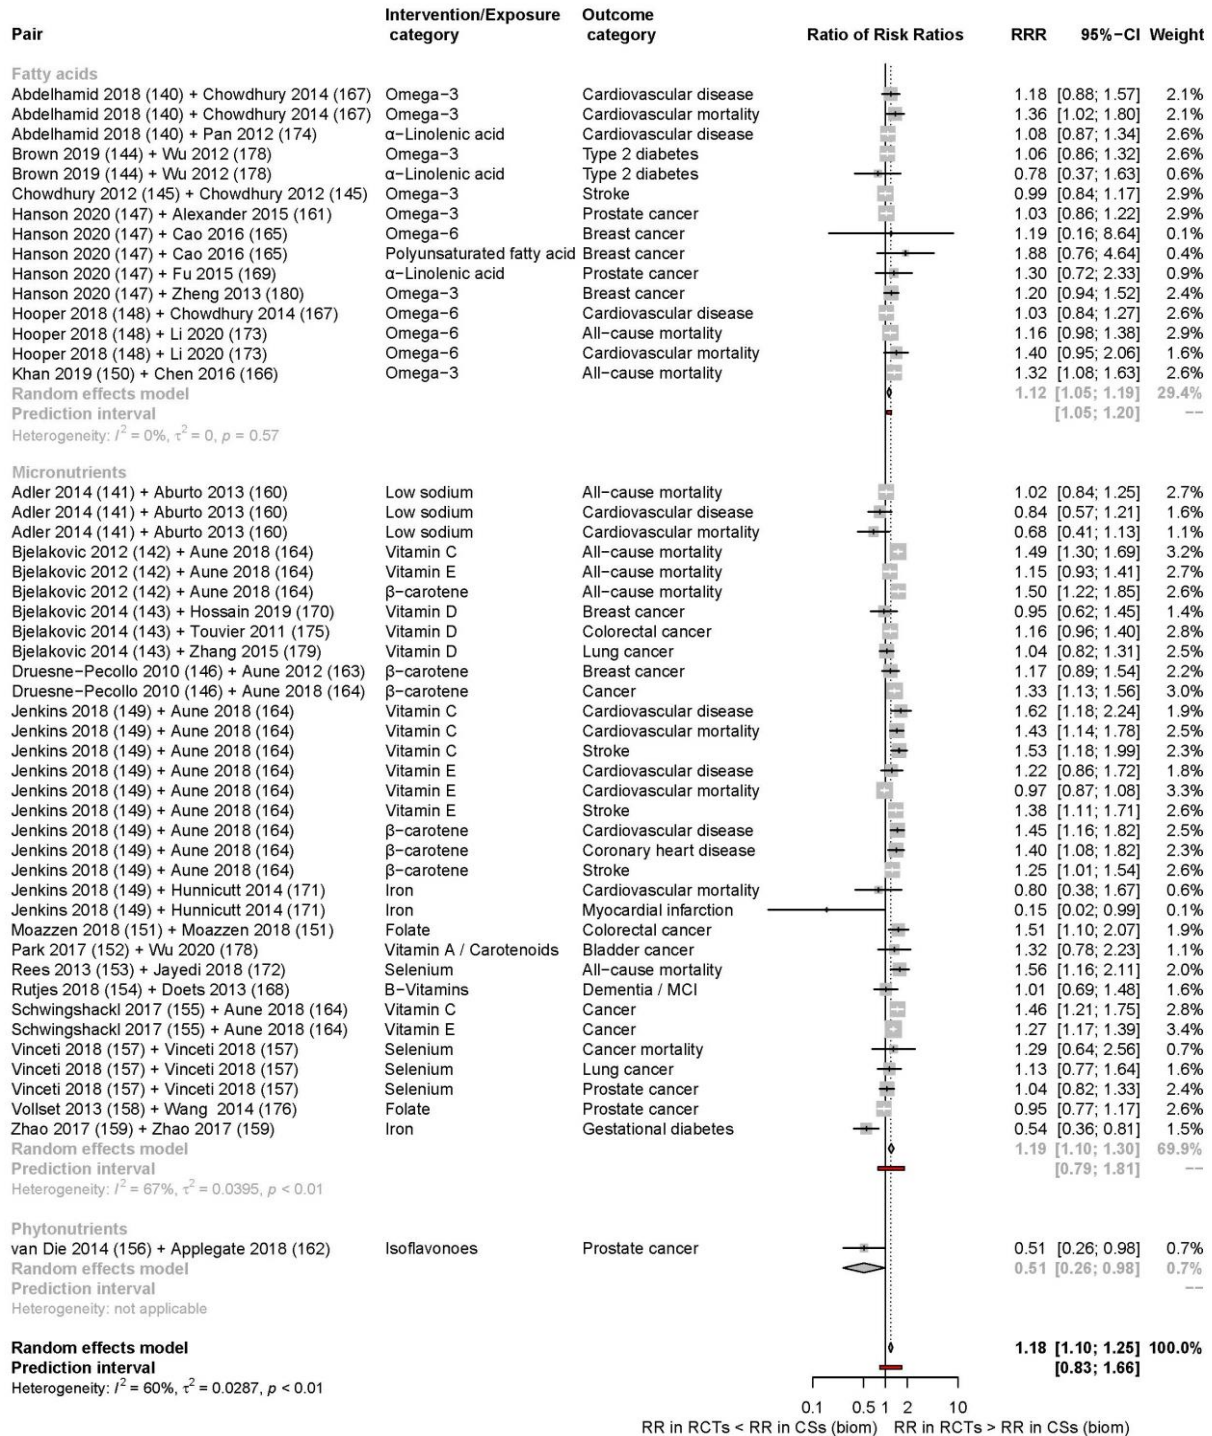

Supplemental Figure 4: Concordance analysis stratified by type of intervention/exposure (RCTs vs. CSs biomarkers of intake).

CSs: cohort studies; MCI: mild cognitive impairment; RCTs: randomized controlled trials; RR: risk ratio; RRR: ratio of risk ratios; 95% CI: 95% confidence interval

Supplementary data

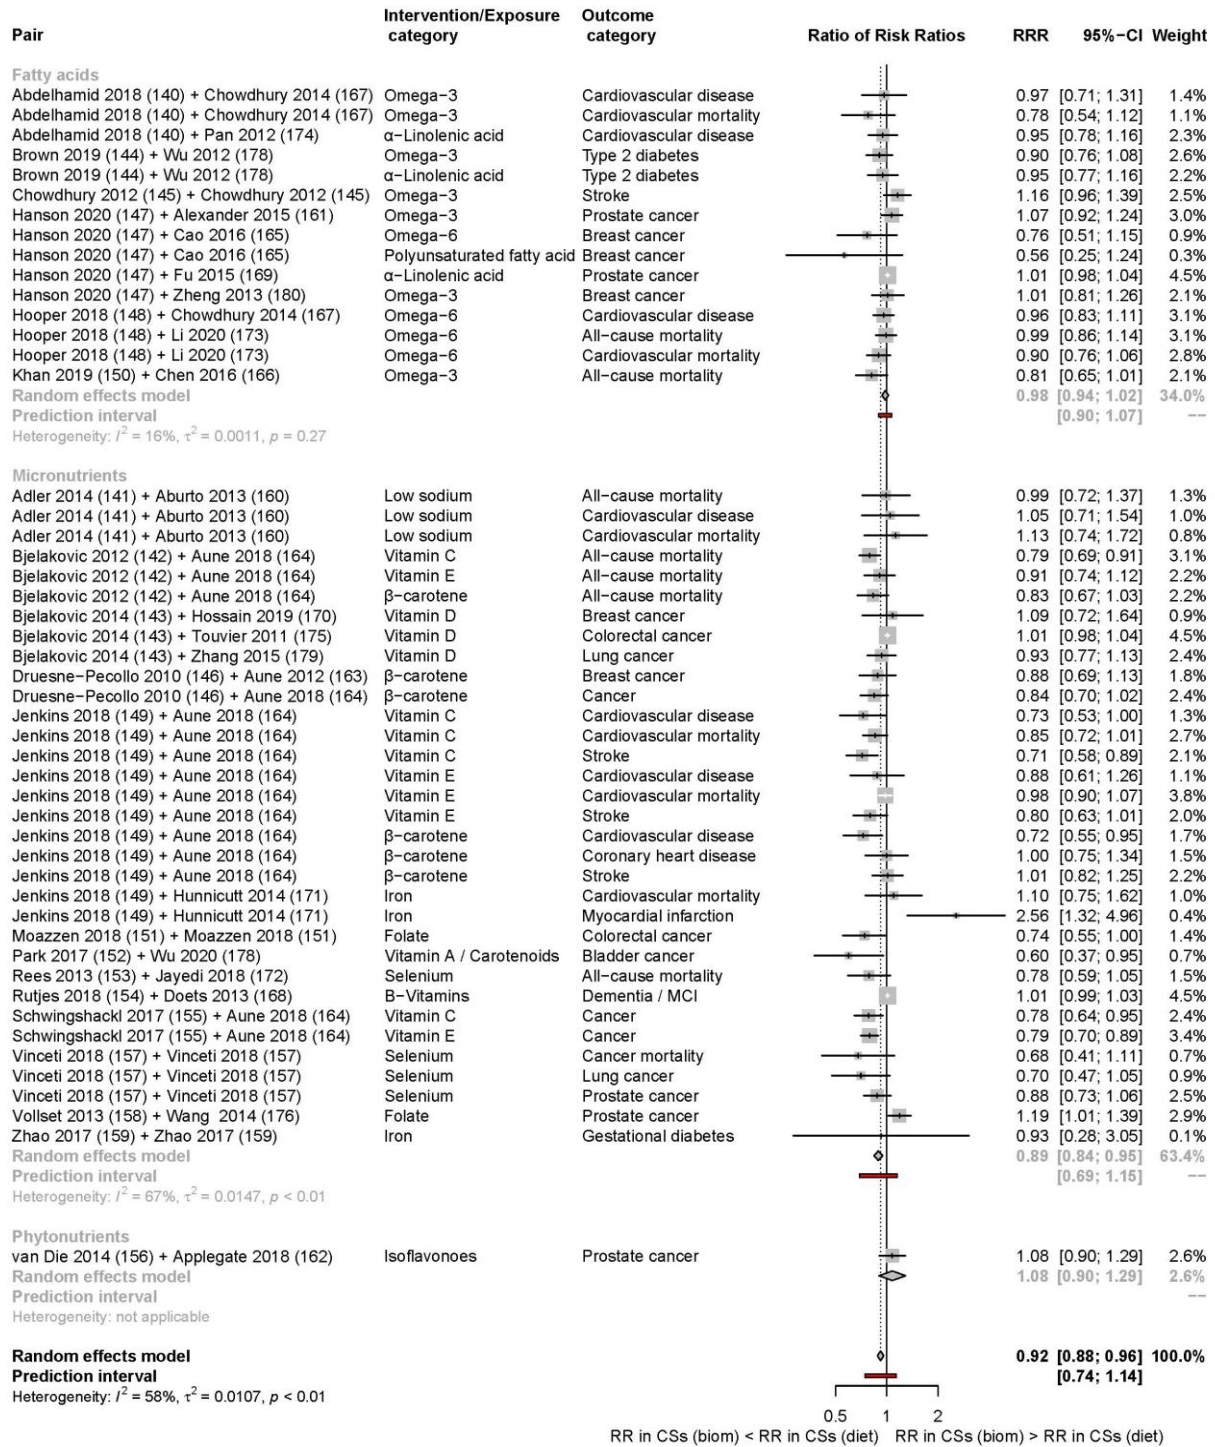

Supplemental Figure 5: Concordance analysis stratified by type of intervention/exposure (CSs dietary intake vs. CSs biomarkers of intake).

CSs: cohort studies; MCI: mild cognitive impairment; RCTs: randomized controlled trials; RR: risk ratio; RRR: ratio of risk ratios; 95% CI: 95% confidence interval

## Supplementary data

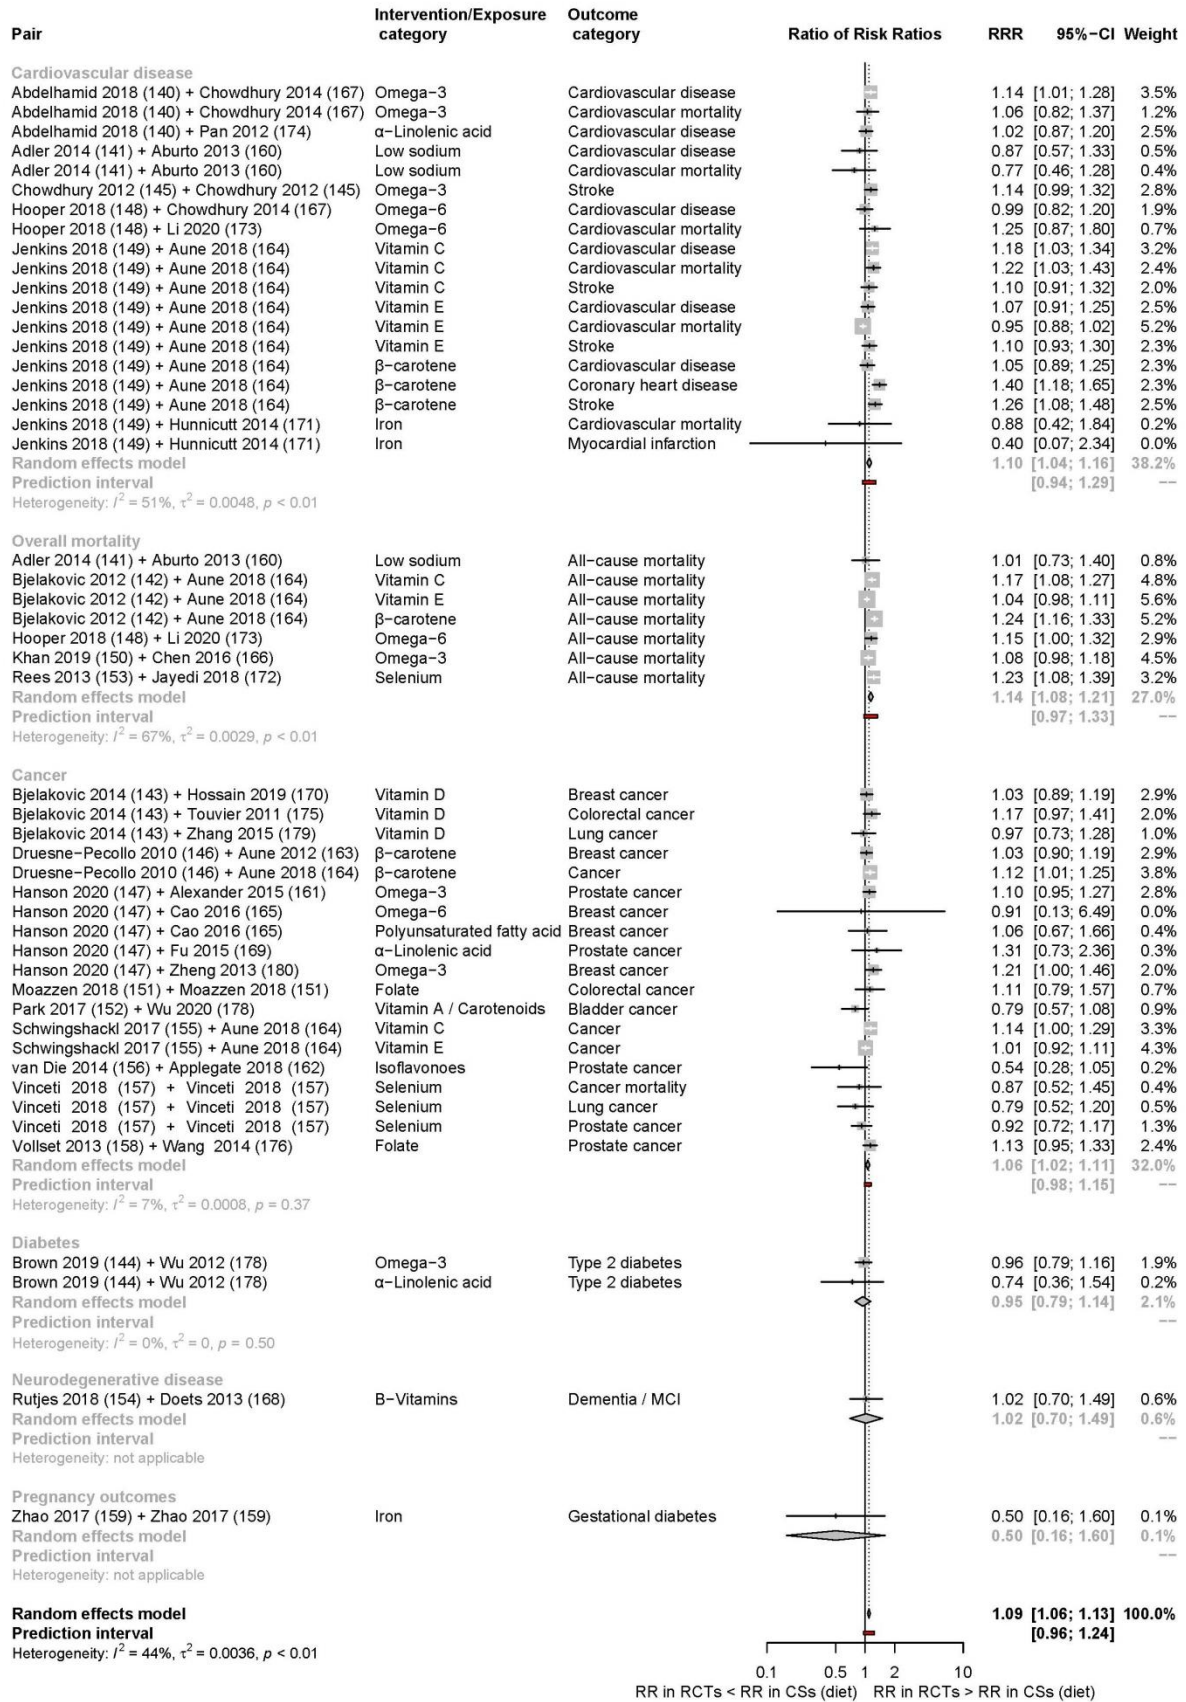

Supplemental Figure 6: Concordance analysis stratified by type of outcome (RCTs vs. CSs dietary intake).

CSs: cohort studies; MCI: mild cognitive impairment; RCTs: randomized controlled trials; RR: risk ratio; RRR: ratio of risk ratios; 95% CI: 95% confidence interval

## Supplementary data

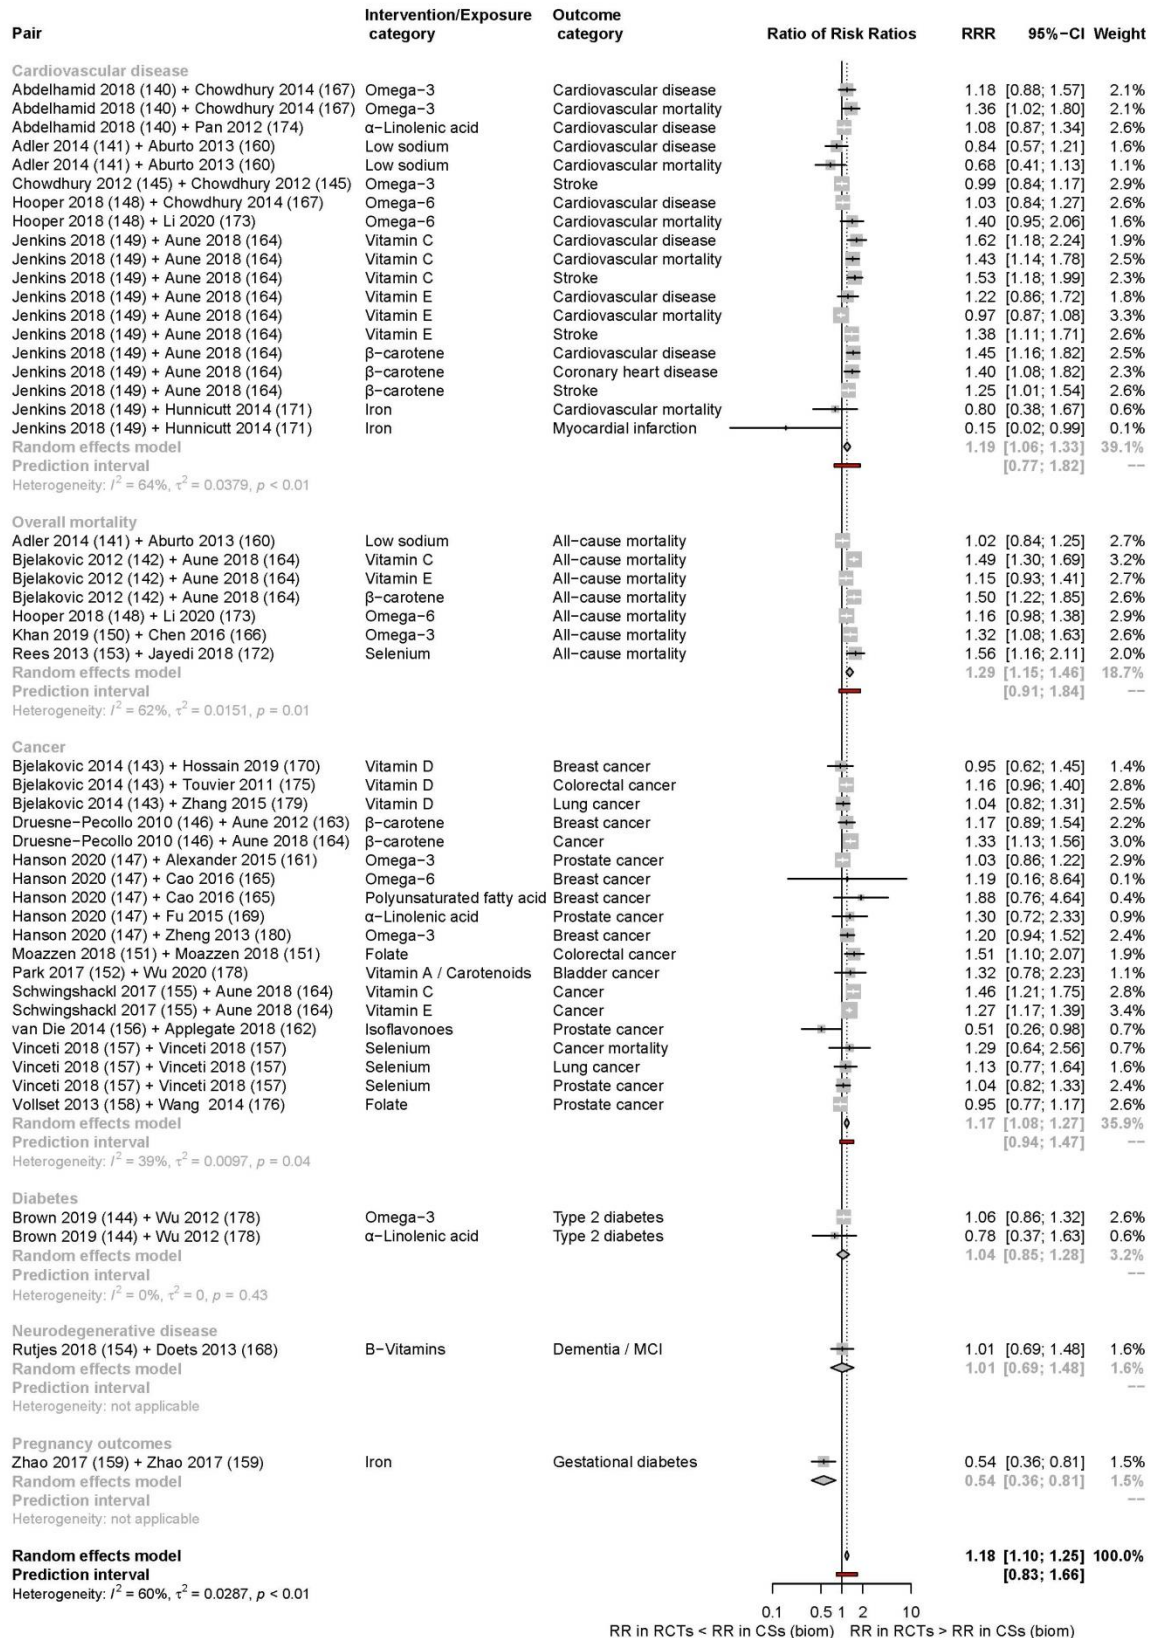

Supplemental Figure 7: Concordance analysis stratified by type of outcome (RCTs vs. CSs biomarkers of intake).

CSs: cohort studies; MCI: mild cognitive impairment; RCTs: randomized controlled trials; RR: risk ratio; RRR: ratio of risk ratios; 95% CI: 95% confidence interval

## Supplementary data

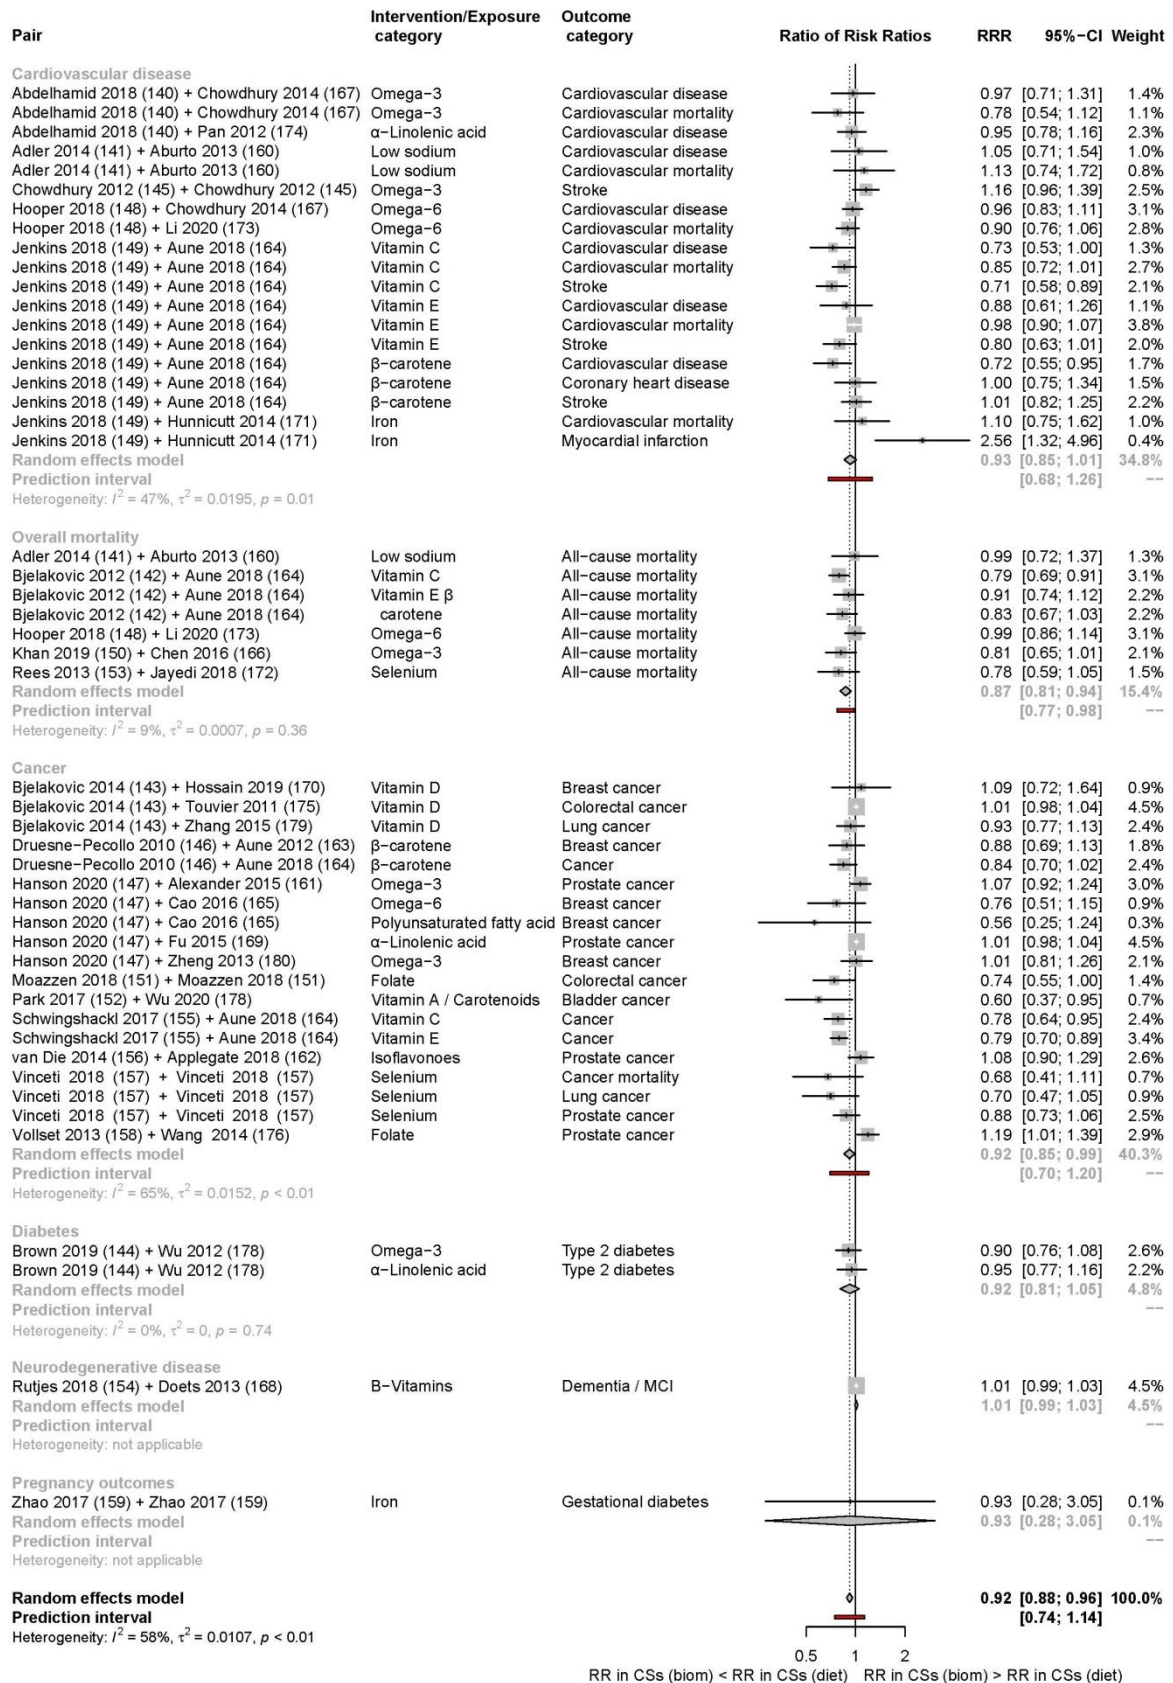

Supplemental Figure 8: Concordance analysis stratified by type of outcome (CSs dietary intake vs. CSs biomarkers of intake).

CSs: cohort studies; MCI: mild cognitive impairment; RCTs: randomized controlled trials; RR: risk ratio; RRR: ratio of risk ratios; 95% CI: 95% confidence interval



## Supplementary data

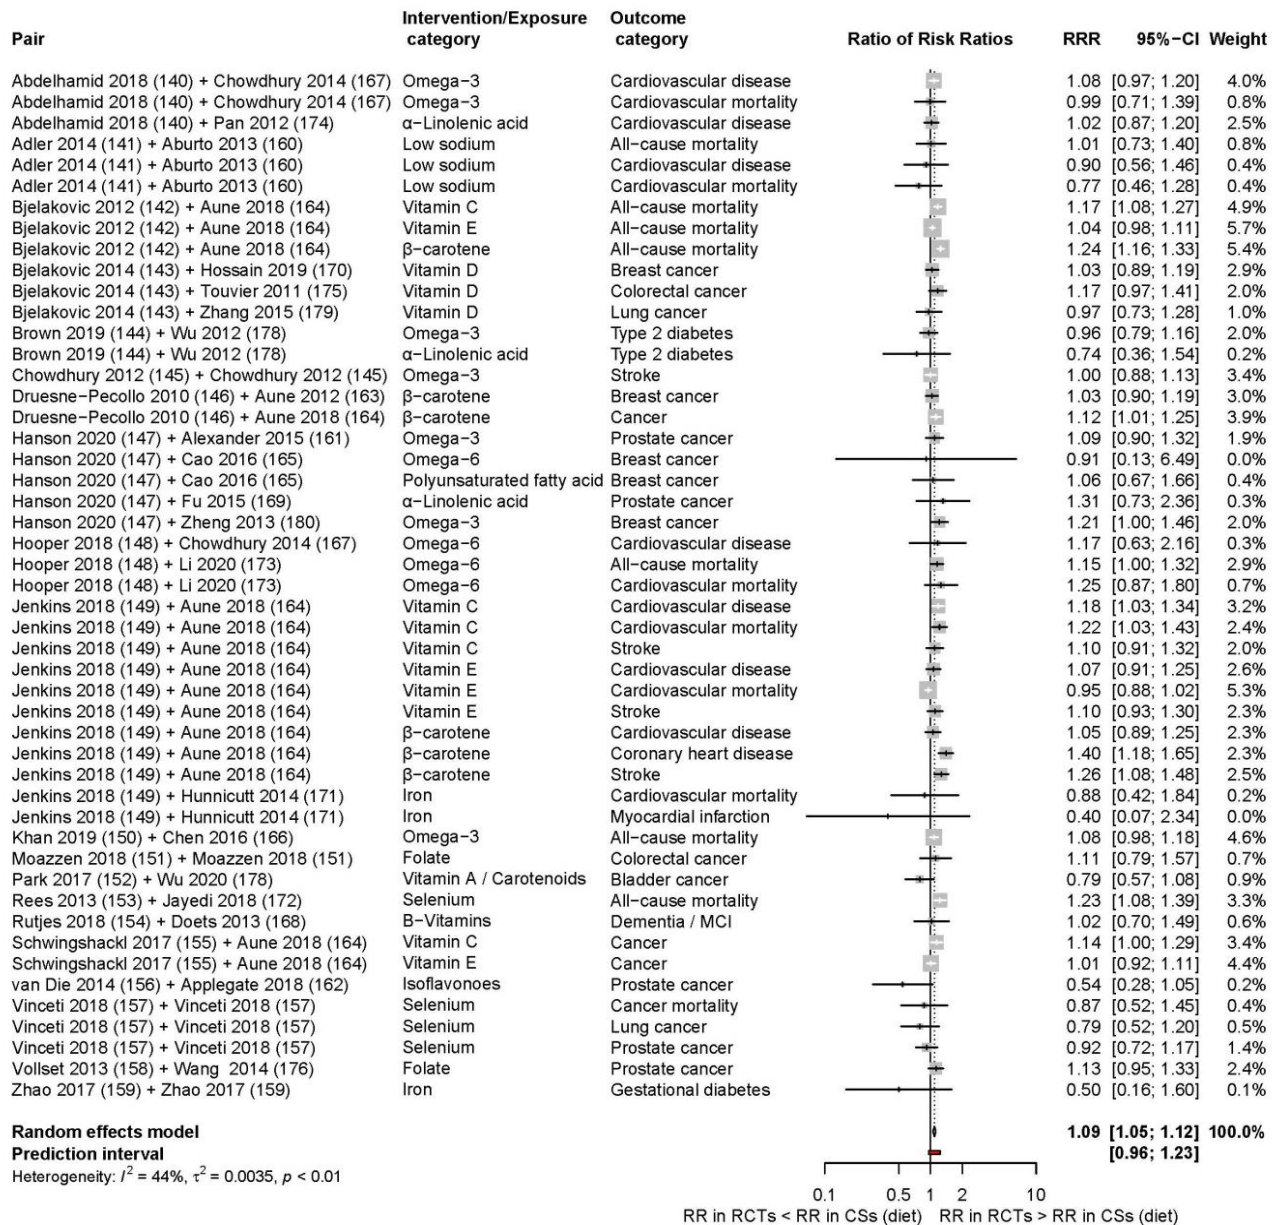

Supplemental Figure 9: Concordance sensitivity analysis using risk estimates for bodies of evidence from RCTs from systematic reviews of cohort studies that included also RCTs (RCTs vs. CSs dietary intake).

CSs: cohort studies; MCI: mild cognitive impairment; RCTs: randomized controlled trials; RR: risk ratio; RRR: ratio of risk ratios; 95% CI: 95% confidence interval

## Supplementary data

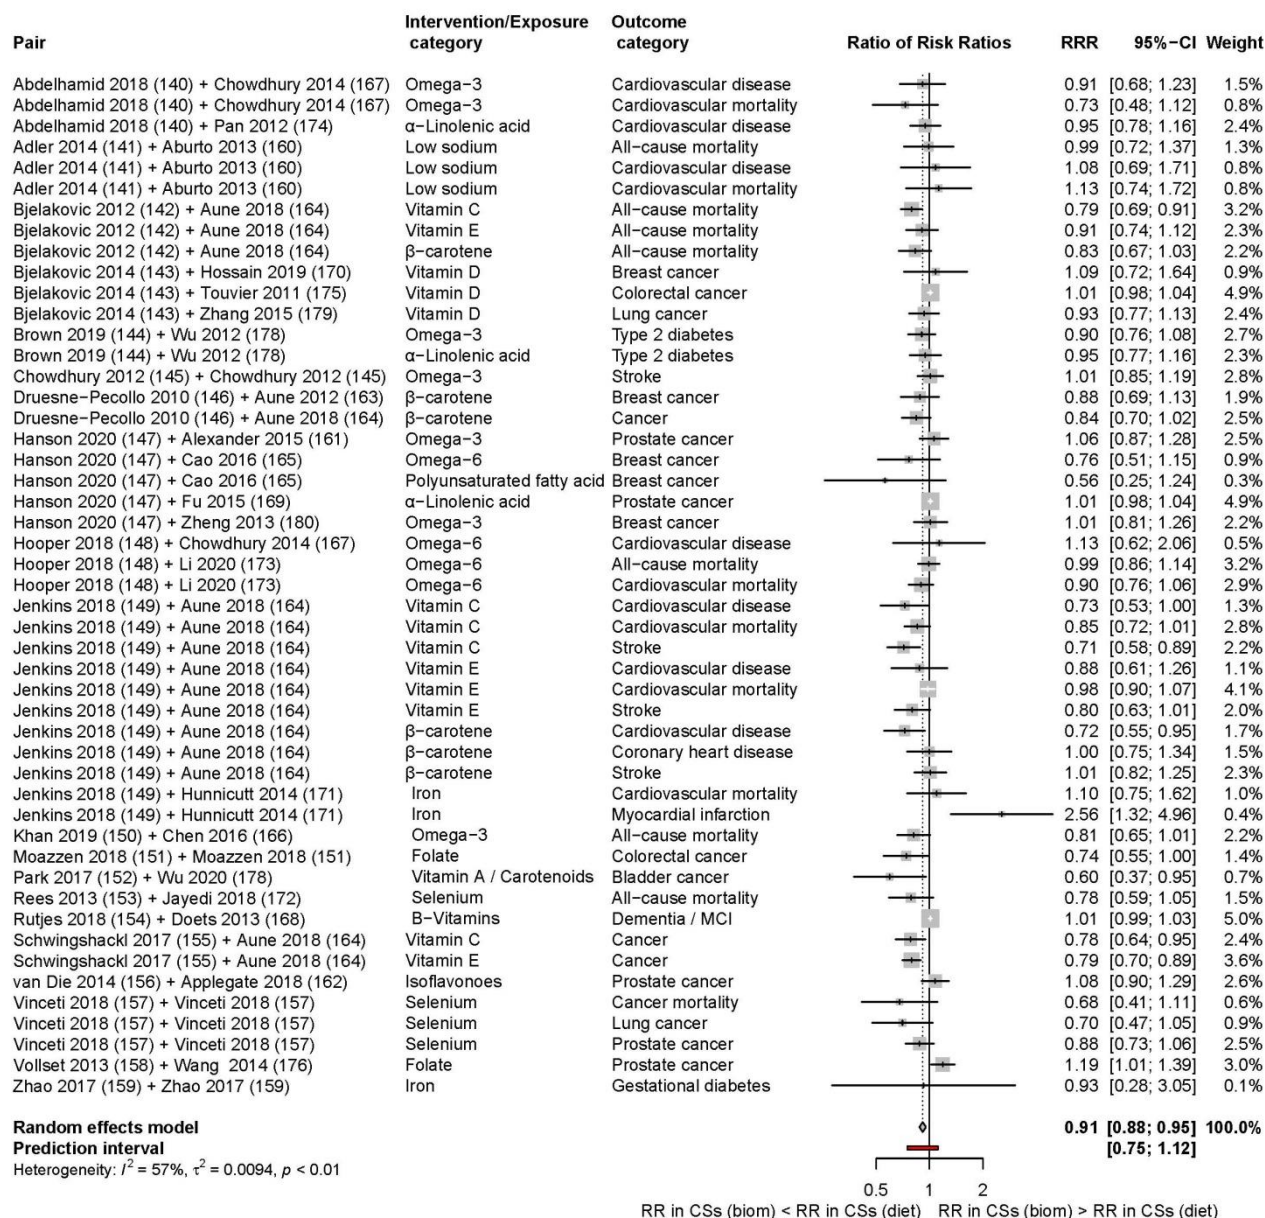

Supplemental Figure 10: Concordance sensitivity analysis using risk estimates for bodies of evidence from RCTs from systematic reviews of cohort studies that included also RCTs (RCTs vs. CSs biomarkers of intake).

CSs: cohort studies; MCI: mild cognitive impairment; RCTs: randomized controlled trials; RR: risk ratio; RRR: ratio of risk ratios; 95% CI: 95% confidence interval

**Supplemental References**

1. Martí-Carvajal AJ, Solà I, Lathyris D, Dayer M. Homocysteine-lowering interventions for preventing cardiovascular events. *Cochrane Database of Systematic Reviews* 2017(8). doi: 10.1002/14651858.CD006612.pub5.
2. Balogun OO, da Silva Lopes K, Ota E, Takemoto Y, Rumbold A, Takegata M, Mori R. Vitamin supplementation for preventing miscarriage. *Cochrane Database Syst Rev* 2016;2016(5):Cd004073. doi: 10.1002/14651858.CD004073.pub4.
3. Buppasiri P, Lumbiganon P, Thinkhamrop J, Ngamjarus C, Laopaiboon M, Medley N. Calcium supplementation (other than for preventing or treating hypertension) for improving pregnancy and infant outcomes. *Cochrane Database Syst Rev* 2015(2):Cd007079. doi: 10.1002/14651858.CD007079.pub3.
4. De-Regil LM, Pena-Rosas JP, Fernandez-Gaxiola AC, Rayco-Solon P. Effects and safety of periconceptional oral folate supplementation for preventing birth defects. *Cochrane Database Syst Rev* 2015(12):Cd007950. doi: 10.1002/14651858.CD007950.pub3.
5. Harding KB, Peña-Rosas JP, Webster AC, Yap CM, Payne BA, Ota E, De-Regil LM. Iodine supplementation for women during the preconception, pregnancy and postpartum period. *Cochrane Database Syst Rev* 2017;3(3):Cd011761. doi: 10.1002/14651858.CD011761.pub2.
6. Hemilä H, Louhiala P. Vitamin C for preventing and treating pneumonia. *Cochrane Database Syst Rev* 2013(8):Cd005532. doi: 10.1002/14651858.CD005532.pub3.
7. Hemmingsen B, Gimenez-Perez G, Mauricio D, Roqué IFM, Metzendorf MI, Richter B. Diet, physical activity or both for prevention or delay of type 2 diabetes mellitus and its associated complications in people at increased risk of developing type 2 diabetes mellitus. *Cochrane Database Syst Rev* 2017;12(12):Cd003054. doi: 10.1002/14651858.CD003054.pub4.
8. Imdad A, Mayo-Wilson E, Herzer K, Bhutta ZA. Vitamin A supplementation for preventing morbidity and mortality in children from six months to five years of age. *Cochrane Database Syst Rev* 2017;3(3):Cd008524. doi: 10.1002/14651858.CD008524.pub3.
9. Imdad A, Ahmed Z, Bhutta ZA. Vitamin A supplementation for the prevention of morbidity and mortality in infants one to six months of age. *Cochrane Database Syst Rev* 2016;9(9):Cd007480. doi: 10.1002/14651858.CD007480.pub3.
10. Lassi ZS, Moin A, Bhutta ZA. Zinc supplementation for the prevention of pneumonia in children aged 2 months to 59 months. *Cochrane Database Syst Rev* 2016;12(12):Cd005978. doi: 10.1002/14651858.CD005978.pub3.
11. Mayo-Wilson E, Junior JA, Imdad A, Dean S, Chan XH, Chan ES, Jaswal A, Bhutta ZA. Zinc supplementation for preventing mortality, morbidity, and growth failure in children aged 6 months to 12 years of age. *Cochrane Database Syst Rev* 2014(5):Cd009384. doi: 10.1002/14651858.CD009384.pub2.
12. Oliveira JM, Allert R, East CE. Vitamin A supplementation for postpartum women. *Cochrane Database Syst Rev* 2016;3:Cd005944. doi: 10.1002/14651858.CD005944.pub3.
13. Salam RA, Zuberi NF, Bhutta ZA. Pyridoxine (vitamin B6) supplementation during pregnancy or labour for maternal and neonatal outcomes. *Cochrane Database Syst Rev* 2015(6):Cd000179. doi: 10.1002/14651858.CD000179.pub3.

## Supplementary data

14. Schwenger EM, Tejani AM, Loewen PS. Probiotics for preventing urinary tract infections in adults and children. *Cochrane Database Syst Rev* 2015(12):Cd008772. doi: 10.1002/14651858.CD008772.pub2.
15. Suchdev PS, Peña-Rosas JP, De-Regil LM. Multiple micronutrient powders for home (point-of-use) fortification of foods in pregnant women. *Cochrane Database Syst Rev* 2015(6):Cd011158. doi: 10.1002/14651858.CD011158.pub2.
16. Evans JR, Lawrenson JG. Antioxidant vitamin and mineral supplements for slowing the progression of age-related macular degeneration. *Cochrane Database of Systematic Reviews* 2017(7). doi: 10.1002/14651858.CD000254.pub4.
17. Abdelhamid AS, Martin N, Bridges C, Brainard JS, Wang X, Brown TJ, Hanson S, Jimoh OF, Ajabnoor SM, Deane KH, et al. Polyunsaturated fatty acids for the primary and secondary prevention of cardiovascular disease. *Cochrane Database Syst Rev* 2018;7(7):Cd012345. doi: 10.1002/14651858.CD012345.pub2.
18. Avenell A, Mak JC, O'Connell D. Vitamin D and vitamin D analogues for preventing fractures in post-menopausal women and older men. *Cochrane Database Syst Rev* 2014;2014(4):Cd000227. doi: 10.1002/14651858.CD000227.pub4.
19. Barrett HL, Dekker Nitert M, Conwell LS, Callaway LK. Probiotics for preventing gestational diabetes. *Cochrane Database Syst Rev* 2014;2014(2):Cd009951. doi: 10.1002/14651858.CD009951.pub2.
20. Bjelakovic G, Gluud LL, Nikolova D, Whitfield K, Wetterslev J, Simonetti RG, Bjelakovic M, Gluud C. Vitamin D supplementation for prevention of mortality in adults. *Cochrane Database Syst Rev* 2014(1):Cd007470. doi: 10.1002/14651858.CD007470.pub3.
21. Chen N, Yang M, Zhou M, Xiao J, Guo J, He L. L-carnitine for cognitive enhancement in people without cognitive impairment. *Cochrane Database Syst Rev* 2017;3(3):Cd009374. doi: 10.1002/14651858.CD009374.pub3.
22. Cormick G, Ciapponi A, Cafferata ML, Belizán JM. Calcium supplementation for prevention of primary hypertension. *Cochrane Database Syst Rev* 2015;2015(6):Cd010037. doi: 10.1002/14651858.CD010037.pub2.
23. Crawford TJ, Crowther CA, Alsweiler J, Brown J. Antenatal dietary supplementation with myo-inositol in women during pregnancy for preventing gestational diabetes. *Cochrane Database Syst Rev* 2015;2015(12):Cd011507. doi: 10.1002/14651858.CD011507.pub2.
24. El Dib R, Gameiro OL, Ogata MS, Modolo NS, Braz LG, Jorge EC, do Nascimento P, Jr., Beletate V. Zinc supplementation for the prevention of type 2 diabetes mellitus in adults with insulin resistance. *Cochrane Database Syst Rev* 2015(5):Cd005525. doi: 10.1002/14651858.CD005525.pub3.
25. Evans JR, Lawrenson JG. Antioxidant vitamin and mineral supplements for preventing age-related macular degeneration. *Cochrane Database Syst Rev* 2017;7(7):Cd000253. doi: 10.1002/14651858.CD000253.pub4.
26. Hartley L, Igbinedion E, Holmes J, Flowers N, Thorogood M, Clarke A, Stranges S, Hooper L, Rees K. Increased consumption of fruit and vegetables for the primary prevention of cardiovascular diseases. *Cochrane Database Syst Rev* 2013;2013(6):Cd009874. doi: 10.1002/14651858.CD009874.pub2.

## Supplementary data

27. Graudal NA, Hubeck-Graudal T, Jurgens G. Effects of low sodium diet versus high sodium diet on blood pressure, renin, aldosterone, catecholamines, cholesterol, and triglyceride. *Cochrane Database Syst Rev* 2017;4(4):Cd004022. doi: 10.1002/14651858.CD004022.pub4.
28. Hartley L, Clar C, Ghannam O, Flowers N, Stranges S, Rees K. Vitamin K for the primary prevention of cardiovascular disease. *Cochrane Database Syst Rev* 2015(9):Cd011148. doi: 10.1002/14651858.CD011148.pub2.
29. Hartley L, May MD, Loveman E, Colquitt JL, Rees K. Dietary fibre for the primary prevention of cardiovascular disease. *Cochrane Database Syst Rev* 2016;2016(1):Cd011472. doi: 10.1002/14651858.CD011472.pub2.
30. He FJ, Li J, Macgregor GA. Effect of longer-term modest salt reduction on blood pressure. *Cochrane Database Syst Rev* 2013(4):Cd004937. doi: 10.1002/14651858.CD004937.pub2.
31. Hofmeyr GJ, Lawrie TA, Atallah Á N, Torloni MR. Calcium supplementation during pregnancy for preventing hypertensive disorders and related problems. *Cochrane Database Syst Rev* 2018;10(10):Cd001059. doi: 10.1002/14651858.CD001059.pub5.
32. Hooper L, Abdelhamid A, Bunn D, Brown T, Summerbell CD, Skeaff CM. Effects of total fat intake on body weight. *Cochrane Database Syst Rev* 2015(8):Cd011834. doi: 10.1002/14651858.Cd011834.
33. Hooper L, Martin N, Abdelhamid A, Davey Smith G. Reduction in saturated fat intake for cardiovascular disease. *Cochrane Database Syst Rev* 2015(6):Cd011737. doi: 10.1002/14651858.Cd011737.
34. Jin H, Leng Q, Li C. Dietary flavonoid for preventing colorectal neoplasms. *Cochrane Database Syst Rev* 2012(8):Cd009350. doi: 10.1002/14651858.CD009350.pub2.
35. Keats EC, Haider BA, Tam E, Bhutta ZA. Multiple-micronutrient supplementation for women during pregnancy. *Cochrane Database Syst Rev* 2019;3(3):Cd004905. doi: 10.1002/14651858.CD004905.pub6.
36. Kelly SA, Hartley L, Loveman E, Colquitt JL, Jones HM, Al-Khudairy L, Clar C, Germanò R, Lunn HR, Frost G, et al. Whole grain cereals for the primary or secondary prevention of cardiovascular disease. *Cochrane Database Syst Rev* 2017;8(8):Cd005051. doi: 10.1002/14651858.CD005051.pub3.
37. Lawrenson JG, Evans JR. Omega 3 fatty acids for preventing or slowing the progression of age-related macular degeneration. *Cochrane Database Syst Rev* 2015;2015(4):Cd010015. doi: 10.1002/14651858.CD010015.pub3.
38. Low MS, Speedy J, Styles CE, De-Regil LM, Pasricha SR. Daily iron supplementation for improving anaemia, iron status and health in menstruating women. *Cochrane Database Syst Rev* 2016;4:Cd009747. doi: 10.1002/14651858.CD009747.pub2.
39. Makrides M, Crosby DD, Bain E, Crowther CA. Magnesium supplementation in pregnancy. *Cochrane Database Syst Rev* 2014;2014(4):Cd000937. doi: 10.1002/14651858.CD000937.pub2.
40. Martin N, Germanò R, Hartley L, Adler AJ, Rees K. Nut consumption for the primary prevention of cardiovascular disease. *Cochrane Database Syst Rev* 2015(9):Cd011583. doi: 10.1002/14651858.CD011583.pub2.

## Supplementary data

41. Rees K, Takeda A, Martin N, Ellis L, Wijesekara D, Vepa A, Das A, Hartley L, Stranges S. Mediterranean-style diet for the primary and secondary prevention of cardiovascular disease. *Cochrane Database Syst Rev* 2019;3(3):Cd009825. doi: 10.1002/14651858.CD009825.pub3.
42. Mathew MC, Ervin AM, Tao J, Davis RM. Antioxidant vitamin supplementation for preventing and slowing the progression of age-related cataract. *Cochrane Database Syst Rev* 2012;6(6):Cd004567. doi: 10.1002/14651858.CD004567.pub2.
43. Middleton P, Gomersall JC, Gould JF, Shepherd E, Olsen SF, Makrides M. Omega-3 fatty acid addition during pregnancy. *Cochrane Database Syst Rev* 2018;11(11):Cd003402. doi: 10.1002/14651858.CD003402.pub3.
44. Ota E, Mori R, Middleton P, Tobe-Gai R, Mahomed K, Miyazaki C, Bhutta ZA. Zinc supplementation for improving pregnancy and infant outcome. *Cochrane Database Syst Rev* 2015;2015(2):Cd000230. doi: 10.1002/14651858.CD000230.pub5.
45. Palacios C, Trak-Fellermeier MA, Martinez RX, Lopez-Perez L, Lips P, Salisi JA, John JC, Peña-Rosas JP. Regimens of vitamin D supplementation for women during pregnancy. *Cochrane Database Syst Rev* 2019;10(10):Cd013446. doi: 10.1002/14651858.Cd013446.
46. Peña-Rosas JP, De-Regil LM, Garcia-Casal MN, Dowswell T. Daily oral iron supplementation during pregnancy. *Cochrane Database Syst Rev* 2015(7):Cd004736. doi: 10.1002/14651858.CD004736.pub5.
47. Rees K, Dyakova M, Wilson N, Ward K, Thorogood M, Brunner E. Dietary advice for reducing cardiovascular risk. *Cochrane Database Syst Rev* 2013(12):Cd002128. doi: 10.1002/14651858.CD002128.pub5.
48. Ried K, Sullivan TR, Fakler P, Frank OR, Stocks NP. Effect of cocoa on blood pressure. *Cochrane Database Syst Rev* 2012(8):Cd008893. doi: 10.1002/14651858.CD008893.pub2.
49. Rumbold A, Ota E, Nagata C, Shahrook S, Crowther CA. Vitamin C supplementation in pregnancy. *Cochrane Database Syst Rev* 2015(9):Cd004072. doi: 10.1002/14651858.CD004072.pub3.
50. Shepherd E, Gomersall JC, Tieu J, Han S, Crowther CA, Middleton P. Combined diet and exercise interventions for preventing gestational diabetes mellitus. *Cochrane Database Syst Rev* 2017;11(11):Cd010443. doi: 10.1002/14651858.CD010443.pub3.
51. Sydenham E, Dangour AD, Lim WS. Omega 3 fatty acid for the prevention of cognitive decline and dementia. *Cochrane Database Syst Rev* 2012(6):Cd005379. doi: 10.1002/14651858.CD005379.pub3.
52. Tieu J, Shepherd E, Middleton P, Crowther CA. Dietary advice interventions in pregnancy for preventing gestational diabetes mellitus. *Cochrane Database Syst Rev* 2017;1(1):Cd006674. doi: 10.1002/14651858.CD006674.pub3.
53. Usinger L, Reimer C, Ibsen H. Fermented milk for hypertension. *Cochrane Database Syst Rev* 2012(4):Cd008118. doi: 10.1002/14651858.CD008118.pub2.
54. Yao Y, Suo T, Andersson R, Cao Y, Wang C, Lu J, Chui E. Dietary fibre for the prevention of recurrent colorectal adenomas and carcinomas. *Cochrane Database Syst Rev* 2017;1(1):Cd003430. doi: 10.1002/14651858.CD003430.pub2.

## Supplementary data

55. Ye Y, Li J, Yuan Z. Effect of antioxidant vitamin supplementation on cardiovascular outcomes: a meta-analysis of randomized controlled trials. *PLoS One* 2013;8(2):e56803. doi: 10.1371/journal.pone.0056803.
56. Graudal N, Jürgens G, Baslund B, Alderman MH. Compared with usual sodium intake, low- and excessive-sodium diets are associated with increased mortality: a meta-analysis. *Am J Hypertens* 2014;27(9):1129-37. doi: 10.1093/ajh/hpu028.
57. Khambalia AZ, Aimone A, Nagubandi P, Roberts CL, McElduff A, Morris JM, Powell KL, Tasevski V, Nassar N. High maternal iron status, dietary iron intake and iron supplement use in pregnancy and risk of gestational diabetes mellitus: a prospective study and systematic review. *Diabet Med* 2016;33(9):1211-21. doi: 10.1111/dme.13056.
58. Al-Khudairy L, Flowers N, Wheelhouse R, Ghannam O, Hartley L, Stranges S, Rees K. Vitamin C supplementation for the primary prevention of cardiovascular disease. *Cochrane Database Syst Rev* 2017;3(3):Cd011114. doi: 10.1002/14651858.CD011114.pub2.
59. Zhou L, Chen B, Sheng L, Turner A. The effect of vitamin D supplementation on the risk of breast cancer: a trial sequential meta-analysis. *Breast Cancer Res Treat* 2020;182(1):1-8. doi: 10.1007/s10549-020-05669-4.
60. Sayehmiri K, Azami M, Mohammadi Y, Soleymani A, Tardeh Z. The association between Selenium and Prostate Cancer: a Systematic Review and Meta-Analysis. *Asian Pac J Cancer Prev* 2018;19(6):1431-7. doi: 10.22034/apjcp.2018.19.6.1431.
61. Novaković R, Geelen A, Ristić-Medić D, Nikolić M, Souverein OW, McNulty H, Duffy M, Hoey L, Dullemeijer C, Renkema JMS, et al. Systematic Review of Observational Studies with Dose-Response Meta-Analysis between Folate Intake and Status Biomarkers in Adults and the Elderly. *Ann Nutr Metab* 2018;73(1):30-43. doi: 10.1159/000490003.
62. Pranger IG, Joustra ML, Corpeleijn E, Muskiet FAJ, Kema IP, Oude Elferink S, Singh-Povel C, Bakker SJL. Fatty acids as biomarkers of total dairy and dairy fat intakes: a systematic review and meta-analysis. *Nutr Rev* 2019;77(1):46-63. doi: 10.1093/nutrit/nuy048.
63. Lin J, Zhang F, Lei Y. Dietary intake and urinary level of cadmium and breast cancer risk: A meta-analysis. *Cancer Epidemiol* 2016;42:101-7. doi: 10.1016/j.canep.2016.04.002.
64. Zgaga L, O'Sullivan F, Cantwell MM, Murray LJ, Thota PN, Coleman HG. Markers of Vitamin D Exposure and Esophageal Cancer Risk: A Systematic Review and Meta-analysis. *Cancer Epidemiol Biomarkers Prev* 2016;25(6):877-86. doi: 10.1158/1055-9965.Epi-15-1162.
65. Zhang Y, Chen J, Qiu J, Li Y, Wang J, Jiao J. Intakes of fish and polyunsaturated fatty acids and mild-to-severe cognitive impairment risks: a dose-response meta-analysis of 21 cohort studies. *Am J Clin Nutr* 2016;103(2):330-40. doi: 10.3945/ajcn.115.124081.
66. Aune D, Chan DS, Lau R, Vieira R, Greenwood DC, Kampman E, Norat T. Dietary fibre, whole grains, and risk of colorectal cancer: systematic review and dose-response meta-analysis of prospective studies. *Bmj* 2011;343:d6617. doi: 10.1136/bmj.d6617.
67. Blencowe H, Cousens S, Modell B, Lawn J. Folic acid to reduce neonatal mortality from neural tube disorders. *Int J Epidemiol* 2010;39 Suppl 1(Suppl 1):i110-21. doi: 10.1093/ije/dyq028.
68. Chia AR, Chen LW, Lai JS, Wong CH, Neelakantan N, van Dam RM, Chong MF. Maternal Dietary Patterns and Birth Outcomes: A Systematic Review and Meta-Analysis. *Adv Nutr* 2019;10(4):685-95. doi: 10.1093/advances/nmy123.

## Supplementary data

69. de Souza RJ, Mente A, Maroleanu A, Cozma AI, Ha V, Kishibe T, Uleryk E, Budyłowski P, Schunemann H, Beyene J, et al. Intake of saturated and trans unsaturated fatty acids and risk of all cause mortality, cardiovascular disease, and type 2 diabetes: systematic review and meta-analysis of observational studies. *Bmj* 2015;351:h3978. doi: 10.1136/bmj.h3978.
70. Godos J, Zappalà G, Bernardini S, Giambini I, Bes-Rastrollo M, Martinez-Gonzalez M. Adherence to the Mediterranean diet is inversely associated with metabolic syndrome occurrence: a meta-analysis of observational studies. *Int J Food Sci Nutr* 2017;68(2):138-48. doi: 10.1080/09637486.2016.1221900.
71. Jayedi A, Zargar MS. Dietary calcium intake and hypertension risk: a dose-response meta-analysis of prospective cohort studies. *Eur J Clin Nutr* 2019;73(7):969-78. doi: 10.1038/s41430-018-0275-y.
72. Jiang H, Yin Y, Wu CR, Liu Y, Guo F, Li M, Ma L. Dietary vitamin and carotenoid intake and risk of age-related cataract. *Am J Clin Nutr* 2019;109(1):43-54. doi: 10.1093/ajcn/nqy270.
73. Kastorini CM, Milionis HJ, Esposito K, Giugliano D, Goudevenos JA, Panagiotakos DB. The effect of Mediterranean diet on metabolic syndrome and its components: a meta-analysis of 50 studies and 534,906 individuals. *J Am Coll Cardiol* 2011;57(11):1299-313. doi: 10.1016/j.jacc.2010.09.073.
74. Leyvraz M, Chatelan A, da Costa BR, Taffe P, Paradis G, Bovet P, Bochud M, Chiolerio A. Sodium intake and blood pressure in children and adolescents: a systematic review and meta-analysis of experimental and observational studies. *Int J Epidemiol* 2018;47(6):1796-810. doi: 10.1093/ije/dyy121.
75. Mijatovic-Vukas J, Capling L, Cheng S, Stamatakis E, Louie J, Cheung NW, Markovic T, Ross G, Senior A, Brand-Miller JC, et al. Associations of Diet and Physical Activity with Risk for Gestational Diabetes Mellitus: A Systematic Review and Meta-Analysis. *Nutrients* 2018;10(6). doi: 10.3390/nu10060698.
76. Noto H, Goto A, Tsujimoto T, Noda M. Low-carbohydrate diets and all-cause mortality: a systematic review and meta-analysis of observational studies. *PLoS One* 2013;8(1):e55030. doi: 10.1371/journal.pone.0055030.
77. Rosato V, Temple NJ, La Vecchia C, Castellan G, Tavani A, Guercio V. Mediterranean diet and cardiovascular disease: a systematic review and meta-analysis of observational studies. *Eur J Nutr* 2019;58(1):173-91. doi: 10.1007/s00394-017-1582-0.
78. Sartorius K, Sartorius B, Madiba TE, Stefan C. Does high-carbohydrate intake lead to increased risk of obesity? A systematic review and meta-analysis. *BMJ Open* 2018;8(2):e018449. doi: 10.1136/bmjopen-2017-018449.
79. Schlesinger S, Neuenschwander M, Schwedhelm C, Hoffmann G, Bechthold A, Boeing H, Schwingshackl L. Food Groups and Risk of Overweight, Obesity, and Weight Gain: A Systematic Review and Dose-Response Meta-Analysis of Prospective Studies. *Adv Nutr* 2019;10(2):205-18. doi: 10.1093/advances/nmy092.
80. Schoenaker DA, Soedamah-Muthu SS, Mishra GD. The association between dietary factors and gestational hypertension and pre-eclampsia: a systematic review and meta-analysis of observational studies. *BMC Med* 2014;12:157. doi: 10.1186/s12916-014-0157-7.
81. Schwingshackl L, Schwedhelm C, Hoffmann G, Knuppel S, Iqbal K, Andriolo V, Bechthold A, Schlesinger S, Boeing H. Food Groups and Risk of Hypertension: A Systematic Review



## Supplementary data

- and Dose-Response Meta-Analysis of Prospective Studies. *Adv Nutr* 2017;8(6):793-803. doi: 10.3945/an.117.017178.
82. Schwingshackl L, Bogensberger B, Hoffmann G. Diet Quality as Assessed by the Healthy Eating Index, Alternate Healthy Eating Index, Dietary Approaches to Stop Hypertension Score, and Health Outcomes: An Updated Systematic Review and Meta-Analysis of Cohort Studies. *J Acad Nutr Diet* 2018;118(1):74-100.e11. doi: 10.1016/j.jand.2017.08.024.
  83. Seidelmann SB, Claggett B, Cheng S, Henglin M, Shah A, Steffen LM, Folsom AR, Rimm EB, Willett WC, Solomon SD. Dietary carbohydrate intake and mortality: a prospective cohort study and meta-analysis. *Lancet Public Health* 2018;3(9):e419-e28. doi: 10.1016/s2468-2667(18)30135-x.
  84. Soedamah-Muthu SS, Verberne LD, Ding EL, Engberink MF, Geleijnse JM. Dairy consumption and incidence of hypertension: a dose-response meta-analysis of prospective cohort studies. *Hypertension* 2012;60(5):1131-7. doi: 10.1161/hypertensionaha.112.195206.
  85. Soltani S, Jayedi A, Shab-Bidar S, Becerra-Tomas N, Salas-Salvado J. Adherence to the Mediterranean Diet in Relation to All-Cause Mortality: A Systematic Review and Dose-Response Meta-Analysis of Prospective Cohort Studies. *Adv Nutr* 2019;10(6):1029-39. doi: 10.1093/advances/nmz041.
  86. Tan C, Zhao Y, Wang S. Is a vegetarian diet safe to follow during pregnancy? A systematic review and meta-analysis of observational studies. *Crit Rev Food Sci Nutr* 2019;59(16):2586-96. doi: 10.1080/10408398.2018.1461062.
  87. Wan Y, Zheng J, Wang F, Li D. Fish, long chain omega-3 polyunsaturated fatty acids consumption, and risk of all-cause mortality: a systematic review and dose-response meta-analysis from 23 independent prospective cohort studies. *Asia Pac J Clin Nutr* 2017;26(5):939-56. doi: 10.6133/apjcn.072017.01.
  88. Wei J, Hou R, Xi Y, Kowalski A, Wang T, Yu Z, Hu Y, Chandrasekar EK, Sun H, Ali MK. The association and dose-response relationship between dietary intake of  $\alpha$ -linolenic acid and risk of CHD: a systematic review and meta-analysis of cohort studies. *Br J Nutr* 2018;119(1):83-9. doi: 10.1017/s0007114517003294.
  89. Wolf HT, Hegaard HK, Huusom LD, Pinborg AB. Multivitamin use and adverse birth outcomes in high-income countries: a systematic review and meta-analysis. *Am J Obstet Gynecol* 2017;217(4):404.e1-e30. doi: 10.1016/j.ajog.2017.03.029.
  90. Ye EQ, Chacko SA, Chou EL, Kugizaki M, Liu S. Greater whole-grain intake is associated with lower risk of type 2 diabetes, cardiovascular disease, and weight gain. *J Nutr* 2012;142(7):1304-13. doi: 10.3945/jn.111.155325.
  91. Zhu Y, Bo Y, Liu Y. Dietary total fat, fatty acids intake, and risk of cardiovascular disease: a dose-response meta-analysis of cohort studies. *Lipids Health Dis* 2019;18(1):91. doi: 10.1186/s12944-019-1035-2.
  92. Leelakanok N, D'Cunha RR, Sutamtewagul G, Schweizer ML. A systematic review and meta-analysis of the association between vitamin A intake, serum vitamin A, and risk of liver cancer. *Nutr Health* 2018;24(2):121-31. doi: 10.1177/0260106018777170.
  93. Xiang S, Dai Z, Man C, Fan Y. Circulating Selenium and Cardiovascular or All-Cause Mortality in the General Population: a Meta-Analysis. *Biol Trace Elem Res* 2020;195(1):55-62. doi: 10.1007/s12011-019-01847-8.

## Supplementary data

94. Yang B, Ren XL, Wang ZY, Wang L, Zhao F, Guo XJ, Li D. Biomarker of long-chain n-3 fatty acid intake and breast cancer: Accumulative evidence from an updated meta-analysis of epidemiological studies. *Crit Rev Food Sci Nutr* 2019;59(19):3152-64. doi: 10.1080/10408398.2018.1485133.
95. Zhang X, Liu C, Guo J, Song Y. Selenium status and cardiovascular diseases: meta-analysis of prospective observational studies and randomized controlled trials. *Eur J Clin Nutr* 2016;70(2):162-9. doi: 10.1038/ejcn.2015.78.
96. Chowdhury R, Kunutsor S, Vitezova A, Oliver-Williams C, Chowdhury S, Kieft-de-Jong JC, Khan H, Baena CP, Prabhakaran D, Hoshen MB, et al. Vitamin D and risk of cause specific death: systematic review and meta-analysis of observational cohort and randomised intervention studies. *Bmj* 2014;348:g1903. doi: 10.1136/bmj.g1903.
97. Feng Y, Cheng G, Wang H, Chen B. The associations between serum 25-hydroxyvitamin D level and the risk of total fracture and hip fracture. *Osteoporos Int* 2017;28(5):1641-52. doi: 10.1007/s00198-017-3955-x.
98. Fernandez-Cao JC, Warthon-Medina M, V HM, Arija V, Doepking C, Serra-Majem L, Lowe NM. Zinc Intake and Status and Risk of Type 2 Diabetes Mellitus: A Systematic Review and Meta-Analysis. *Nutrients* 2019;11(5). doi: 10.3390/nu11051027.
99. Goodwill AM, Szoek C. A Systematic Review and Meta-Analysis of The Effect of Low Vitamin D on Cognition. *J Am Geriatr Soc* 2017;65(10):2161-8. doi: 10.1111/jgs.15012.
100. Han J, Guo X, Yu X, Liu S, Cui X, Zhang B, Liang H. 25-Hydroxyvitamin D and Total Cancer Incidence and Mortality: A Meta-Analysis of Prospective Cohort Studies. *Nutrients* 2019;11(10). doi: 10.3390/nu11102295.
101. Hu L, Zhang Y, Wang X, You L, Xu P, Cui X, Zhu L, Ji C, Guo X, Wen J. Maternal Vitamin D Status and Risk of Gestational Diabetes: a Meta-Analysis. *Cell Physiol Biochem* 2018;45(1):291-300. doi: 10.1159/000486810.
102. Song GG, Bae SC, Lee YH. Association between vitamin D intake and the risk of rheumatoid arthritis: a meta-analysis. *Clin Rheumatol* 2012;31(12):1733-9. doi: 10.1007/s10067-012-2080-7.
103. Tous M, Villalobos M, Iglesias L, Fernandez-Barres S, Arija V. Vitamin D status during pregnancy and offspring outcomes: a systematic review and meta-analysis of observational studies. *Eur J Clin Nutr* 2020;74(1):36-53. doi: 10.1038/s41430-018-0373-x.
104. Yuan Y, Tai W, Xu P, Fu Z, Wang X, Long W, Guo X, Ji C, Zhang L, Zhang Y, et al. Association of maternal serum 25-hydroxyvitamin D concentrations with risk of preeclampsia: a nested case-control study and meta-analysis. *J Matern Fetal Neonatal Med* 2019:1-10. doi: 10.1080/14767058.2019.1640675.
105. Zhou Y, Wang T, Zhai S, Li W, Meng Q. Linoleic acid and breast cancer risk: a meta-analysis. *Public Health Nutr* 2016;19(8):1457-63. doi: 10.1017/s136898001500289x.
106. Chuang SC, Rota M, Gunter MJ, Zeleniuch-Jacquotte A, Eussen SJ, Vollset SE, Ueland PM, Norat T, Ziegler RG, Vineis P. Quantifying the dose-response relationship between circulating folate concentrations and colorectal cancer in cohort studies: a meta-analysis based on a flexible meta-regression model. *Am J Epidemiol* 2013;178(7):1028-37. doi: 10.1093/aje/kwt083.

## Supplementary data

107. Farvid MS, Ding M, Pan A, Sun Q, Chiuve SE, Steffen LM, Willett WC, Hu FB. Dietary linoleic acid and risk of coronary heart disease: a systematic review and meta-analysis of prospective cohort studies. *Circulation* 2014;130(18):1568-78. doi: 10.1161/circulationaha.114.010236.
108. Fu S, Li F, Zhou J, Liu Z. The Relationship Between Body Iron Status, Iron Intake And Gestational Diabetes: A Systematic Review and Meta-Analysis. *Medicine (Baltimore)* 2016;95(2):e2383. doi: 10.1097/md.0000000000002383.
109. Hong Z, Tian C, Zhang X. Dietary calcium intake, vitamin D levels, and breast cancer risk: a dose-response analysis of observational studies. *Breast Cancer Res Treat* 2012;136(1):309-12. doi: 10.1007/s10549-012-2172-8.
110. Jayedi A, Rashidy-Pour A, Parohan M, Zargar MS, Shab-Bidar S. Dietary and circulating vitamin C, vitamin E,  $\beta$ -carotene and risk of total cardiovascular mortality: a systematic review and dose-response meta-analysis of prospective observational studies. *Public Health Nutr* 2019;22(10):1872-87. doi: 10.1017/s1368980018003725.
111. Kim Y, Je Y. Vitamin D intake, blood 25(OH)D levels, and breast cancer risk or mortality: a meta-analysis. *Br J Cancer* 2014;110(11):2772-84. doi: 10.1038/bjc.2014.175.
112. Perez-Cornago A, Appleby PN, Boeing H, Gil L, Kyrø C, Ricceri F, Murphy N, Trichopoulou A, Tsilidis KK, Khaw KT, et al. Circulating isoflavone and lignan concentrations and prostate cancer risk: a meta-analysis of individual participant data from seven prospective studies including 2,828 cases and 5,593 controls. *Int J Cancer* 2018;143(11):2677-86. doi: 10.1002/ijc.31640.
113. Xu X, Yu E, Liu L, Zhang W, Wei X, Gao X, Song N, Fu C. Dietary intake of vitamins A, C, and E and the risk of colorectal adenoma: a meta-analysis of observational studies. *Eur J Cancer Prev* 2013;22(6):529-39. doi: 10.1097/CEJ.0b013e328364f1eb.
114. Ben S, Du M, Ma G, Qu J, Zhu L, Chu H, Zhang Z, Wu Y, Gu D, Wang M. Vitamin B(2) intake reduces the risk for colorectal cancer: a dose-response analysis. *Eur J Nutr* 2019;58(4):1591-602. doi: 10.1007/s00394-018-1702-5.
115. Berger S, Raman G, Vishwanathan R, Jacques PF, Johnson EJ. Dietary cholesterol and cardiovascular disease: a systematic review and meta-analysis. *Am J Clin Nutr* 2015;102(2):276-94. doi: 10.3945/ajcn.114.100305.
116. Cao H, Wang C, Chai R, Dong Q, Tu S. Iron intake, serum iron indices and risk of colorectal adenomas: a meta-analysis of observational studies. *Eur J Cancer Care (Engl)* 2017;26(5). doi: 10.1111/ecc.12486.
117. Chang VC, Cotterchio M, Khoo E. Iron intake, body iron status, and risk of breast cancer: a systematic review and meta-analysis. *BMC Cancer* 2019;19(1):543. doi: 10.1186/s12885-019-5642-0.
118. Chen X, Zhou T, Chen M. Meta analysis of the association of cholesterol with pancreatic carcinoma risk. *J buon* 2015;20(1):109-13.
119. Chen P, Zhang W, Wang X, Zhao K, Negi DS, Zhuo L, Qi M, Wang X, Zhang X. Lycopene and Risk of Prostate Cancer: A Systematic Review and Meta-Analysis. *Medicine (Baltimore)* 2015;94(33):e1260. doi: 10.1097/md.0000000000001260.

## Supplementary data

120. Chen HG, Sheng LT, Zhang YB, Cao AL, Lai YW, Kunutsor SK, Jiang L, Pan A. Association of vitamin K with cardiovascular events and all-cause mortality: a systematic review and meta-analysis. *Eur J Nutr* 2019;58(6):2191-205. doi: 10.1007/s00394-019-01998-3.
121. Cheng HM, Koutsidis G, Lodge JK, Ashor AW, Siervo M, Lara J. Lycopene and tomato and risk of cardiovascular diseases: A systematic review and meta-analysis of epidemiological evidence. *Crit Rev Food Sci Nutr* 2019;59(1):141-58. doi: 10.1080/10408398.2017.1362630.
122. Del Gobbo LC, Imamura F, Wu JH, de Oliveira Otto MC, Chiuve SE, Mozaffarian D. Circulating and dietary magnesium and risk of cardiovascular disease: a systematic review and meta-analysis of prospective studies. *Am J Clin Nutr* 2013;98(1):160-73. doi: 10.3945/ajcn.112.053132.
123. Fonseca-Nunes A, Jakszyn P, Agudo A. Iron and cancer risk--a systematic review and meta-analysis of the epidemiological evidence. *Cancer Epidemiol Biomarkers Prev* 2014;23(1):12-31. doi: 10.1158/1055-9965.Epi-13-0733.
124. Han H, Fang X, Wei X, Liu Y, Jin Z, Chen Q, Fan Z, Aaseth J, Hiyoshi A, He J, et al. Dose-response relationship between dietary magnesium intake, serum magnesium concentration and risk of hypertension: a systematic review and meta-analysis of prospective cohort studies. *Nutr J* 2017;16(1):26. doi: 10.1186/s12937-017-0247-4.
125. Kunutsor SK, Apekey TA, Steur M. Vitamin D and risk of future hypertension: meta-analysis of 283,537 participants. *Eur J Epidemiol* 2013;28(3):205-21. doi: 10.1007/s10654-013-9790-2.
126. Leermakers ET, Darweesh SK, Baena CP, Moreira EM, Melo van Lent D, Tielemans MJ, Muka T, Vitezova A, Chowdhury R, Bramer WM, et al. The effects of lutein on cardiometabolic health across the life course: a systematic review and meta-analysis. *Am J Clin Nutr* 2016;103(2):481-94. doi: 10.3945/ajcn.115.120931.
127. Mocellin S, Briarava M, Pilati P. Vitamin B6 and Cancer Risk: A Field Synopsis and Meta-Analysis. *J Natl Cancer Inst* 2017;109(3):1-9. doi: 10.1093/jnci/djw230.
128. Kolahdouz Mohammadi R, Bagheri M, Kolahdouz Mohammadi M, Shidfar F. Ruminant trans-fatty acids and risk of breast cancer: a systematic review and meta-analysis of observational studies. *Minerva Endocrinol* 2017;42(4):385-96. doi: 10.23736/s0391-1977.16.02514-1.
129. Park HY, Hong YC, Lee K, Koh J. Vitamin D status and risk of non-Hodgkin lymphoma: An updated meta-analysis. *PLoS One* 2019;14(4):e0216284. doi: 10.1371/journal.pone.0216284.
130. Qu X, Jin F, Hao Y, Li H, Tang T, Wang H, Yan W, Dai K. Magnesium and the risk of cardiovascular events: a meta-analysis of prospective cohort studies. *PLoS One* 2013;8(3):e57720. doi: 10.1371/journal.pone.0057720.
131. Rienks J, Barbaresko J, Oluwagbemigun K, Schmid M, Nöthlings U. Polyphenol exposure and risk of type 2 diabetes: dose-response meta-analyses and systematic review of prospective cohort studies. *Am J Clin Nutr* 2018;108(1):49-61. doi: 10.1093/ajcn/nqy083.
132. Soltani S, Kolahdouz Mohammadi R, Shab-Bidar S, Vafa M, Salehi-Abargouei A. Sodium status and the metabolic syndrome: A systematic review and meta-analysis of observational studies. *Crit Rev Food Sci Nutr* 2019;59(2):196-206. doi: 10.1080/10408398.2017.1363710.

## Supplementary data

133. Song B, Liu K, Gao Y, Zhao L, Fang H, Li Y, Pei L, Xu Y. Lycopene and risk of cardiovascular diseases: A meta-analysis of observational studies. *Mol Nutr Food Res* 2017;61(9). doi: 10.1002/mnfr.201601009.
134. Wang Y, Cui R, Xiao Y, Fang J, Xu Q. Effect of Carotene and Lycopene on the Risk of Prostate Cancer: A Systematic Review and Dose-Response Meta-Analysis of Observational Studies. *PLoS One* 2015;10(9):e0137427. doi: 10.1371/journal.pone.0137427.
135. Xu J, Song C, Song X, Zhang X, Li X. Carotenoids and risk of fracture: a meta-analysis of observational studies. *Oncotarget* 2017;8(2):2391-9. doi: 10.18632/oncotarget.13678.
136. Yang B, Shi MQ, Li ZH, Yang JJ, Li D. Fish, Long-Chain n-3 PUFA and Incidence of Elevated Blood Pressure: A Meta-Analysis of Prospective Cohort Studies. *Nutrients* 2016;8(1). doi: 10.3390/nu8010058.
137. Zhang Z, Bergan R, Shannon J, Slatore CG, Bobe G, Takata Y. The Role of Cruciferous Vegetables and Isothiocyanates for Lung Cancer Prevention: Current Status, Challenges, and Future Research Directions. *Mol Nutr Food Res* 2018;62(18):e1700936. doi: 10.1002/mnfr.201700936.
138. Zhao Y, Chen C, Pan W, Gao M, He W, Mao R, Lin T, Huang J. Comparative efficacy of vitamin D status in reducing the risk of bladder cancer: A systematic review and network meta-analysis. *Nutrition* 2016;32(5):515-23. doi: 10.1016/j.nut.2015.10.023.
139. Gilbert R, Martin RM, Beynon R, Harris R, Savovic J, Zuccolo L, Bekkering GE, Fraser WD, Sterne JA, Metcalfe C. Associations of circulating and dietary vitamin D with prostate cancer risk: a systematic review and dose-response meta-analysis. *Cancer Causes Control* 2011;22(3):319-40. doi: 10.1007/s10552-010-9706-3.
140. Abdelhamid AS, Brown TJ, Brainard JS, Biswas P, Thorpe GC, Moore HJ, Deane KH, AlAbdulghafoor FK, Summerbell CD, Worthington HV, et al. Omega-3 fatty acids for the primary and secondary prevention of cardiovascular disease. *Cochrane Database Syst Rev* 2018;11:Cd003177. doi: 10.1002/14651858.CD003177.pub4.
141. Adler AJ, Taylor F, Martin N, Gottlieb S, Taylor RS, Ebrahim S. Reduced dietary salt for the prevention of cardiovascular disease. *Cochrane Database Syst Rev* 2014(12):Cd009217. doi: 10.1002/14651858.CD009217.pub3.
142. Bjelakovic G, Nikolova D, Gluud LL, Simonetti RG, Gluud C. Antioxidant supplements for prevention of mortality in healthy participants and patients with various diseases. *Cochrane Database Syst Rev* 2012(3):Cd007176. doi: 10.1002/14651858.CD007176.pub2.
143. Bjelakovic G, Gluud LL, Nikolova D, Whitfield K, Krstic G, Wetterslev J, Gluud C. Vitamin D supplementation for prevention of cancer in adults. *Cochrane Database Syst Rev* 2014(6):Cd007469. doi: 10.1002/14651858.CD007469.pub2.
144. Brown TJ, Brainard J, Song F, Wang X, Abdelhamid A, Hooper L. Omega-3, omega-6, and total dietary polyunsaturated fat for prevention and treatment of type 2 diabetes mellitus: systematic review and meta-analysis of randomised controlled trials. *Bmj* 2019;366:l4697. doi: 10.1136/bmj.l4697.
145. Chowdhury R, Stevens S, Gorman D, Pan A, Warnakula S, Chowdhury S, Ward H, Johnson L, Crowe F, Hu FB, et al. Association between fish consumption, long chain omega 3 fatty acids, and risk of cerebrovascular disease: systematic review and meta-analysis. *BMJ : British Medical Journal* 2012;345:e6698. doi: 10.1136/bmj.e6698.

## Supplementary data

146. Druesne-Pecollo N, Latino-Martel P, Norat T, Barrandon E, Bertrais S, Galan P, Hercberg S. Beta-carotene supplementation and cancer risk: a systematic review and metaanalysis of randomized controlled trials. *Int J Cancer* 2010;127(1):172-84. doi: 10.1002/ijc.25008.
147. Hanson S, Thorpe G, Winstanley L, Abdelhamid AS, Hooper L, Abdelhamid A, Ajabnoor S, Alabdulghafoor F, Alkhudairy L, Biswas P, et al. Omega-3, omega-6 and total dietary polyunsaturated fat on cancer incidence: systematic review and meta-analysis of randomised trials. *British Journal of Cancer* 2020;122(8):1260-70. doi: 10.1038/s41416-020-0761-6.
148. Hooper L, Al-Khudairy L, Abdelhamid AS, Rees K, Brainard JS, Brown TJ, Ajabnoor SM, O'Brien AT, Winstanley LE, Donaldson DH, et al. Omega-6 fats for the primary and secondary prevention of cardiovascular disease. *Cochrane Database Syst Rev* 2018;11:CD011094. doi: 10.1002/14651858.CD011094.pub4.
149. Jenkins DJA, Spence JD, Giovannucci EL, Kim YI, Josse R, Vieth R, Blanco Mejia S, Viguiliouk E, Nishi S, Sahye-Pudaruth S, et al. Supplemental Vitamins and Minerals for CVD Prevention and Treatment. *J Am Coll Cardiol* 2018;71(22):2570-84. doi: 10.1016/j.jacc.2018.04.020.
150. Khan SU, Khan MU, Riaz H, Valavoor S, Zhao D, Vaughan L, Okunrintemi V, Riaz IB, Khan MS, Kaluski E, et al. Effects of Nutritional Supplements and Dietary Interventions on Cardiovascular Outcomes: An Umbrella Review and Evidence Map. *Ann Intern Med* 2019;171(3):190-8. doi: 10.7326/m19-0341.
151. Moazzen S, Dolatkah R, Tabrizi JS, Shaarbafi J, Alizadeh BZ, de Bock GH, Dastgiri S. Folic acid intake and folate status and colorectal cancer risk: A systematic review and meta-analysis. *Clin Nutr* 2018;37(6 Pt A):1926-34. doi: 10.1016/j.clnu.2017.10.010.
152. Park SJ, Myung SK, Lee Y, Lee YJ. Effects of Vitamin and Antioxidant Supplements in Prevention of Bladder Cancer: a Meta-Analysis of Randomized Controlled Trials. *J Korean Med Sci* 2017;32(4):628-35. doi: 10.3346/jkms.2017.32.4.628.
153. Rees K, Hartley L, Day C, Flowers N, Clarke A, Stranges S. Selenium supplementation for the primary prevention of cardiovascular disease. *Cochrane Database Syst Rev* 2013(1):Cd009671. doi: 10.1002/14651858.CD009671.pub2.
154. Rutjes AW, Denton DA, Di Nisio M, Chong LY, Abraham RP, Al-Assaf AS, Anderson JL, Malik MA, Vernooij RW, Martinez G, et al. Vitamin and mineral supplementation for maintaining cognitive function in cognitively healthy people in mid and late life. *Cochrane Database Syst Rev* 2018;12:CD011906. doi: 10.1002/14651858.CD011906.pub2.
155. Schwingshackl L, Boeing H, Stelmach-Mardas M, Gottschald M, Dietrich S, Hoffmann G, Chaimani A. Dietary Supplements and Risk of Cause-Specific Death, Cardiovascular Disease, and Cancer: A Systematic Review and Meta-Analysis of Primary Prevention Trials. *Adv Nutr* 2017;8(1):27-39. doi: 10.3945/an.116.013516.
156. van Die MD, Bone KM, Williams SG, Pirotta MV. Soy and soy isoflavones in prostate cancer: a systematic review and meta-analysis of randomized controlled trials. *BJU Int* 2014;113(5b):E119-30. doi: 10.1111/bju.12435.
157. Vinceti M, Filippini T, Del Giovane C, Dennert G, Zwahlen M, Brinkman M, Zeegers MP, Horneber M, D'Amico R, Crespi CM. Selenium for preventing cancer. *Cochrane Database Syst Rev* 2018;1:CD005195. doi: 10.1002/14651858.CD005195.pub4.
158. Vollset SE, Clarke R, Lewington S, Ebbing M, Halsey J, Lonn E, Armitage J, Manson JE, Hankey GJ, Spence JD, et al. Effects of folic acid supplementation on overall and site-specific

## Supplementary data

- cancer incidence during the randomised trials: meta-analyses of data on 50,000 individuals. *Lancet* 2013;381(9871):1029-36. doi: 10.1016/S0140-6736(12)62001-7.
159. Zhao L, Lian J, Tian J, Shen Y, Ping Z, Fang X, Min J, Wang F. Dietary intake of heme iron and body iron status are associated with the risk of gestational diabetes mellitus: a systematic review and meta-analysis. *Asia Pac J Clin Nutr* 2017;26(6):1092-106. doi: 10.6133/apjcn.022017.09.
160. Aburto NJ, Ziolkovska A, Hooper L, Elliott P, Cappuccio FP, Meerpohl JJ. Effect of lower sodium intake on health: systematic review and meta-analyses. *Bmj* 2013;346:f1326. doi: 10.1136/bmj.f1326.
161. Alexander DD, Bassett JK, Weed DL, Barrett EC, Watson H, Harris W. Meta-Analysis of Long-Chain Omega-3 Polyunsaturated Fatty Acids (LC $\omega$ -3PUFA) and Prostate Cancer. *Nutr Cancer* 2015;67(4):543-54. doi: 10.1080/01635581.2015.1015745.
162. Applegate CC, Rowles JL, Ranard KM, Jeon S, Erdman JW. Soy Consumption and the Risk of Prostate Cancer: An Updated Systematic Review and Meta-Analysis. *Nutrients* 2018;10(1). doi: 10.3390/nu10010040.
163. Aune D, Chan DS, Vieira AR, Navarro Rosenblatt DA, Vieira R, Greenwood DC, Norat T. Dietary compared with blood concentrations of carotenoids and breast cancer risk: a systematic review and meta-analysis of prospective studies. *Am J Clin Nutr* 2012;96(2):356-73. doi: 10.3945/ajcn.112.034165.
164. Aune D, Keum N, Giovannucci E, Fadnes LT, Boffetta P, Greenwood DC, Tonstad S, Vatten LJ, Riboli E, Norat T. Dietary intake and blood concentrations of antioxidants and the risk of cardiovascular disease, total cancer, and all-cause mortality: a systematic review and dose-response meta-analysis of prospective studies. *Am J Clin Nutr* 2018;108(5):1069-91. doi: 10.1093/ajcn/nqy097.
165. Cao Y, Hou L, Wang W. Dietary total fat and fatty acids intake, serum fatty acids and risk of breast cancer: A meta-analysis of prospective cohort studies. *Int J Cancer* 2016;138(8):1894-904. doi: 10.1002/ijc.29938.
166. Chen GC, Yang J, Eggersdorfer M, Zhang W, Qin LQ. N-3 long-chain polyunsaturated fatty acids and risk of all-cause mortality among general populations: a meta-analysis. *Sci Rep* 2016;6:28165. doi: 10.1038/srep28165.
167. Chowdhury R, Warnakula S, Kunutsor S, Crowe F, Ward HA, Johnson L, Franco OH, Butterworth AS, Forouhi NG, Thompson SG, et al. Association of dietary, circulating, and supplement fatty acids with coronary risk: a systematic review and meta-analysis. *Ann Intern Med* 2014;160(6):398-406. doi: 10.7326/m13-1788.
168. Doets EL, van Wijngaarden JP, Szczecinska A, Dullemeijer C, Souverein OW, Dhonukshe-Rutten RA, Cavelaars AE, van 't Veer P, Brzozowska A, de Groot LC. Vitamin B12 intake and status and cognitive function in elderly people. *Epidemiol Rev* 2013;35:2-21. doi: 10.1093/epirev/mxs003.
169. Fu YQ, Zheng JS, Yang B, Li D. Effect of individual omega-3 fatty acids on the risk of prostate cancer: a systematic review and dose-response meta-analysis of prospective cohort studies. *J Epidemiol* 2015;25(4):261-74. doi: 10.2188/jea.JE20140120.
170. Hossain S, Beydoun MA, Beydoun HA, Chen X, Zonderman AB, Wood RJ. Vitamin D and breast cancer: A systematic review and meta-analysis of observational studies. *Clin Nutr ESPEN* 2019;30:170-84. doi: 10.1016/j.clnesp.2018.12.085.

## Supplementary data

171. Hunnicutt J, He K, Xun P. Dietary iron intake and body iron stores are associated with risk of coronary heart disease in a meta-analysis of prospective cohort studies. *J Nutr* 2014;144(3):359-66. doi: 10.3945/jn.113.185124.
172. Jayedi A, Rashidy-Pour A, Parohan M, Zargar MS, Shab-Bidar S. Dietary Antioxidants, Circulating Antioxidant Concentrations, Total Antioxidant Capacity, and Risk of All-Cause Mortality: A Systematic Review and Dose-Response Meta-Analysis of Prospective Observational Studies. *Adv Nutr* 2018;9(6):701-16. doi: 10.1093/advances/nmy040.
173. Li J, Guasch-Ferre M, Li Y, Hu FB. Dietary intake and biomarkers of linoleic acid and mortality: systematic review and meta-analysis of prospective cohort studies. *Am J Clin Nutr* 2020. doi: 10.1093/ajcn/nqz349.
174. Pan A, Chen M, Chowdhury R, Wu JH, Sun Q, Campos H, Mozaffarian D, Hu FB. alpha-Linolenic acid and risk of cardiovascular disease: a systematic review and meta-analysis. *Am J Clin Nutr* 2012;96(6):1262-73. doi: 10.3945/ajcn.112.044040.
175. Touvier M, Chan DS, Lau R, Aune D, Vieira R, Greenwood DC, Kampman E, Riboli E, Hercberg S, Norat T. Meta-analyses of vitamin D intake, 25-hydroxyvitamin D status, vitamin D receptor polymorphisms, and colorectal cancer risk. *Cancer Epidemiol Biomarkers Prev* 2011;20(5):1003-16. doi: 10.1158/1055-9965.Epi-10-1141.
176. Wang R, Zheng Y, Huang JY, Zhang AQ, Zhou YH, Wang JN. Folate intake, serum folate levels, and prostate cancer risk: a meta-analysis of prospective studies. *BMC Public Health* 2014;14:1326. doi: 10.1186/1471-2458-14-1326.
177. Wu JH, Micha R, Imamura F, Pan A, Biggs ML, Ajaz O, Djousse L, Hu FB, Mozaffarian D. Omega-3 fatty acids and incident type 2 diabetes: a systematic review and meta-analysis. *Br J Nutr* 2012;107 Suppl 2(0 2):S214-27. doi: 10.1017/s0007114512001602.
178. Wu S, Liu Y, Michalek JE, Mesa RA, Parma DL, Rodriguez R, Mansour AM, Svatek R, Tucker TC, Ramirez AG. Carotenoid Intake and Circulating Carotenoids Are Inversely Associated with the Risk of Bladder Cancer: A Dose-Response Meta-analysis. *Adv Nutr* 2020;11(3):630-43. doi: 10.1093/advances/nmz120.
179. Zhang L, Wang S, Che X, Li X. Vitamin D and lung cancer risk: a comprehensive review and meta-analysis. *Cell Physiol Biochem* 2015;36(1):299-305. doi: 10.1159/000374072.
180. Zheng JS, Hu XJ, Zhao YM, Yang J, Li D. Intake of fish and marine n-3 polyunsaturated fatty acids and risk of breast cancer: meta-analysis of data from 21 independent prospective cohort studies. *Bmj* 2013;346:f3706. doi: 10.1136/bmj.f3706.
